# Supplementary material for: Synthesis of a novel category of pseudo-peptides using an Ugi three-component reaction of levulinic acid as bifunctional substrate, amines, and amino acid-based isocyanides
Source: publisher site journal article supplement (doi:10.3762/bjoc.15.82), 2019-04-04
Supplement: Additional file 1 [file 1860-5397-15-82-S1.pdf]

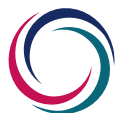

## Supporting Information

for

### **Synthesis of a novel category of pseudo-peptides using an Ugi three-component reaction of levulinic acid as bifunctional substrate, amines, and amino acid-based isocyanides**

Maryam Khalesi, Azim Ziyaei Halimehjani and Jürgen Martens

*Beilstein J. Org. Chem.* **2019**, *15*, 852–857. [doi:10.3762/bjoc.15.82](https://doi.org/10.3762/bjoc.15.82)

### **Experimental procedures, characterization data and copies of $^1\text{H}$ and $^{13}\text{C}$ NMR spectra of all compounds**

| <b>Content</b>                                                             | <b>Pages</b> |
|----------------------------------------------------------------------------|--------------|
| General experimental procedure and characterization data for all compounds | S2–S6        |
| Copies of $^1\text{H}$ and $^{13}\text{C}$ NMR spectra for all compounds   | S7–S22       |
| Crystal data of compound ( <i>R</i> *, <i>S</i> *)- <b>4a</b>              | S23          |

## General experimental procedure and characterization data for all compounds

**General.** All reagents and solvents were analytically pure and were used as received. Column chromatographic purification was carried out using SiO<sub>2</sub> (0.040-0.060 mm, type KG 60). TLC was performed on Macherey-Nagel SiO<sub>2</sub> F254 plates on aluminum sheets. Melting points were determined with a Branstead Electrothermal 9200 apparatus and are uncorrected. IR spectra were recorded on a Perkin-Elmer FT RX1 spectrophotometer over the range 400–4000 cm<sup>-1</sup>. <sup>1</sup>H and <sup>13</sup>C NMR spectra of isolated products were recorded on a Bruker AMX R500 (measuring frequency: <sup>1</sup>H NMR = 500.1 MHz, <sup>13</sup>C NMR = 125.8 MHz) or a Bruker Avance III 500 (measuring frequency: <sup>1</sup>H NMR = 499.9 MHz, <sup>13</sup>C NMR = 125.7 MHz) in CDCl<sub>3</sub> solution. HRMS (high-resolution mass spectra) were measured on a THERMO SCIENTIFIC Advantage and a THERMO SCIENTIFIC Exactive instrument. Elemental analyses were conducted with a Perkin-Elmer 2004 (II) CHN analyzer.

### General procedure for the synthesis of amino acid-based isocyanides 3a–c

(a) *General procedure for the preparation of DL-amino acid methyl ester hydrochlorides:* DL-amino acid (50 mmol) was dissolved in MeOH (550 mL) and the solution was cooled in an ice/salt bath. Then, thionyl chloride (50 mmol) was added dropwise for 1 hour. The reaction temperature was maintained between –5–0 °C during the addition. Then, the reaction mixture was stirred for 24 h at room temperature. Finally, the reaction mixture was concentrated on a rotary evaporator to give the crude product. The crude product was washed with DCM (two times) to give the corresponding pure racemic amino acid ester hydrochloride.

(b) *General procedure for the formylation of DL-amino acid methyl ester hydrochlorides:* DL-amino acid methyl ester hydrochloride (20 mmol) was dissolved in ethyl formate (100 mL)/EtOH (30 mL) mixture. Then, sodium bicarbonate (20 mmol) was added to the flask. The reaction mixture was stirred at 50 °C for 2 days. After the completion of the reaction, the mixture was filtered for removing the excess amount of sodium bicarbonate. Then, the filtrate was concentrated on a rotary evaporator to give the product.

(c) *General procedure for the transformation of DL-formamide to DL-isocyanide:* DL-formylated amino acid methyl ester (20 mmol) was dissolved in DCM (200 mL) and TEA (100 mmol) was added to the solution at room temperature. Then the reaction mixture was cooled in an ice/salt bath to maintain the temperature between –10 and –5 °C. Then, phosphorus oxychloride (20 mmol) was added dropwise to the reaction mixture and was stirred for 2 h. The reaction mixture was quenched by aqueous NaHCO<sub>3</sub> and the organic phase was separated, dried over Na<sub>2</sub>SO<sub>4</sub>, and evaporated under reduced pressure to give a precipitate. The precipitate was purified by column chromatography using DCM as solvent.

### General procedure for the synthesis of Ugi adducts:

A solution of levulinic acid (**1**, 1 mmol) and an amine **2** (1 mmol) in MeOH (5 mL) was stirred for 0.5 h at room temperature. Then, *DL*-amino acid-based isocyanide **3** (1 mmol) was added to the reaction mixture at the same temperature. The reaction progress was monitored by TLC. After 24 h, the solvent was removed under reduced pressure and the precipitate purified by column chromatography using petroleum ether and ethyl acetate mixture as eluent (SiO<sub>2</sub>, PE/EtOAc; 2:1 v/v). All products were obtained as 1:1 mixture of diastereomers after column chromatography as determined by <sup>1</sup>H NMR spectroscopy. All compounds were characterized using IR, <sup>1</sup>H NMR, <sup>13</sup>C NMR and HRMS or CHN analyses.

Methyl (2-methyl-5-oxo-1-phenylpyrrolidine-2-carbonyl)tryptophanate (**4a**): White crystalline solid (yield, 318 mg, 72%); mp: 158 – 159 °C; <sup>1</sup>H NMR (500 MHz, Chloroform-*d*)  $\delta$  1.35 (s, 3H), 2.00 (m, 1H), 2.42 – 2.54 (m, 2H), 2.72 (m, 1H), 3.26 (dd, *J* = 14.9 and 7.9 Hz, 1H), 3.41 (m, 1H), 3.77 (s, 3H), 4.90 (m, 1H), 6.52 (d, *J* = 7.1 Hz, 1H), 6.84 (d, *J* = 2.5 Hz, 1H), 6.91 – 6.94 (m, 2H), 7.08 – 7.18 (m, 4H), 7.21 – 7.25 (m, 1H), 7.32 (m, 1H), 7.55 (dd, *J* = 8.0 and 1.0 Hz, 1H), 8.13 (brs, 1H) ppm; <sup>13</sup>C NMR (126 MHz, Chloroform-*d*)  $\delta$  22.3, 27.2, 30.3, 34.1, 52.4, 52.5, 68.3, 109.4, 111.5, 118.3, 119.8, 122.6, 122.7, 122.8, 125.6, 126.9, 128.9, 135.9, 136.4, 172.0, 173.4, 175.4 ppm; IR (KBr):  $\nu$  3328, 1736, 1690, 1659, 1595, 1381, 1229, 748 cm<sup>-1</sup>; Anal. calcd for C<sub>24</sub>H<sub>25</sub>N<sub>3</sub>O<sub>4</sub> (419.47) C, 68.72; H, 6.01; N, 10.02; Found: C, 68.42; H, 6.04; N, 9.88%.

The (*R*\*,*S*\*)-diastereomer (*R*\*,*S*\*)-**4a** was obtained from **4a** (a mixture of two racemic diastereomers) as a pure compound after several recrystallization steps from MeOH.

Methyl (1-(4-chlorophenyl)-2-methyl-5-oxopyrrolidine-2-carbonyl)tryptophanate (**4b**): White crystalline solid (yield, 240 mg, 53%); mp: 155 – 156 °C; <sup>1</sup>H NMR (500 MHz, Chloroform-*d*)  $\delta$  1.33 (s, 3H), 1.89 (m, 1H), 2.13 (m, 1H), 2.31 (m, 1H), 2.51 (m, 1H), 3.20 (m, 1H), 2.37 (m, 1H), 3.80 (s, 3H), 4.91 (dd, *J* = 7.3 and 5.3 Hz, 1H), 6.79 – 6.85 (m, 2H), 6.86 (s, 1H), 6.96 – 7.04 (m, 2H), 7.14 (m, 1H), 7.27 (m, 1H), 7.36 (t, *J* = 8.0 Hz, 2H), 7.54 (d, *J* = 7.9 Hz, 1H), 8.11 (brs, 1H) ppm; <sup>13</sup>C NMR (126 MHz, Chloroform-*d*)  $\delta$  22.6, 27.1, 29.7, 30.2, 33.8, 52.5, 68.4, 109.4, 111.5, 118.3, 122.6, 122.8, 126.6, 126.9, 127.6, 129.1, 132.6, 134.4, 136.3, 172.05, 172.9, 175.6 ppm; IR (KBr):  $\nu$  3259, 1746, 1691, 1644, 1358, 1221, 822, 739 cm<sup>-1</sup>; HRMS calcd for C<sub>24</sub>H<sub>24</sub>ClN<sub>3</sub>O<sub>4</sub> [M + Na]<sup>+</sup> 476.1353; Found . 476.1351.

Methyl (1-(2-chlorobenzyl)-2-methyl-5-oxopyrrolidine-2-carbonyl)tryptophanate (**4c**): Yellow crystalline solid (yield, 320 mg, 68%); mp 150 – 154 °C; <sup>1</sup>H NMR (500 MHz, Chloroform-*d*)  $\delta$  1.28 (s, 3H), 1.86 (m, 1H), 2.17 (m, 1H), 2.32 (m, 1H), 2.47 (m, 1H), 3.18 (m, 1H), 3.31 (m, 1H), 3.74 (s, 3H), 4.03 (d, *J* = 16.3 Hz, 1H), 4.62 (d, *J* = 16.4 Hz, 1H), 4.79 (m, 1H), 6.99 (d, *J* = 2.3 Hz, 1H), 7.10–7.45 (m, 8H), 7.53 (m, 1H), 8.34 (brs, 1H) ppm; <sup>13</sup>C NMR (126 MHz, Chloroform-*d*)  $\delta$  22.4, 27.1, 29.3, 32.9, 41.4, 41.7, 52.6, 67.5, 109.5, 111.5, 118.3, 119.8, 122.5, 127.0, 127.1, 128.2, 128.5, 128.8, 129.3, 129.4, 134.7, 136.2, 171.8, 173.0, 176.3

ppm; IR (KBr):  $\nu$  3261, 1749, 1683, 1656, 1539, 1202, 740  $\text{cm}^{-1}$ ; Anal. calcd for  $\text{C}_{25}\text{H}_{26}\text{ClN}_3\text{O}_4$  (467.1612) C, 64.17; H, 5.60; N, 8.98; Found: C, 64.12; H, 5.72; N, 8.58%.

Methyl (1-(4-fluorophenyl)-2-methyl-5-oxopyrrolidine-2-carbonyl)tryptophanate (**4d**): Cream solid (yield, 385 mg, 88%); mp: 114 – 115  $^{\circ}\text{C}$ ;  $^1\text{H}$  NMR (500 MHz, Chloroform-*d*)  $\delta$  1.31 (s, 3H), 1.96 (m, 1H), 2.34 (m, 1H), 2.45 (m, 1H), 2.74 (m, 1H), 3.24 (m, 1H), 3.40 (m, 1H), 3.81 (s, 3H), 4.89 (m, 1H), 6.45 (d,  $J = 6.2$  Hz, 1H), 6.75 – 7.24 (m, 7H), 7.35 (m, 1H), 7.55 (dd,  $J = 7.9$  and 1.0 Hz, 1H), 8.16 (brs, 1H) ppm;  $^{13}\text{C}$  NMR (126 MHz, Chloroform-*d*)  $\delta$  22.5, 27.2, 29.8, 33.9, 52.5, 52.6, 68.3, 109.5, 111.4, 115.9 (d,  $^2J_{\text{C-F}} = 25$  Hz), 118.3, 119.9, 122.6, 126.9, 127.7, 128.5, 131.6, 136.3, 160.3 (d,  $^1J_{\text{C-F}} = 246$  Hz), 172.0, 173.0, 175.6 ppm; IR (KBr):  $\nu$  3302, 1743, 1694, 1657, 1372, 1218, 839, 744  $\text{cm}^{-1}$ ; HRMS calcd for  $\text{C}_{24}\text{H}_{24}\text{FN}_3\text{O}_4$  [ $\text{M} + \text{Na}$ ] $^{+}$  460.1649; Found: 460.1643.

Methyl (1-(3-methoxyphenyl)-2-methyl-5-oxopyrrolidine-2-carbonyl)tryptophanate (**4e**): Viscous oil (yield, 224 mg, 51%);  $^1\text{H}$  NMR (500 MHz, Chloroform-*d*)  $\delta$  1.38 (s, 3H), 1.96 (m, 1H), 2.17 (m, 1H), 2.42 (m, 1H), 2.70 (m, 1H), 3.28 (m, 1H), 3.37 (m, 1H), 3.68 (s, 3H), 3.76 (s, 3H), 4.87 (m, 1H), 6.46 (m, 1H), 6.54 (m, 1H), 6.70 – 7.05 (m, 3H), 7.11 (m, 1H), 7.17 – 7.25 (m, 2H), 7.33 (dd,  $J = 7.9$  and 1.0 Hz, 1H), 7.53 (dd,  $J = 8.0$  and 1.0 Hz, 1H), 8.18 (brs, 1H) ppm;  $^{13}\text{C}$  NMR (126 MHz, Chloroform-*d*)  $\delta$  22.4, 22.6, 27.2, 29.9, 34.0, 52.4, 55.25, 68.6, 109.4, 111.5, 111.8, 112.4, 118.4, 118.9, 119.8, 122.5, 122.8, 122.9, 129.6, 136.3, 137.0, 159.9, 172.0, 173.2, 175.5 ppm; IR (KBr):  $\nu$  3327, 1741, 1658, 1602, 1363, 1211, 745  $\text{cm}^{-1}$ ; HRMS calcd for  $\text{C}_{25}\text{H}_{27}\text{N}_3\text{O}_5$  [ $\text{M} + \text{Na}$ ] $^{+}$  472.1848; Found: 472.1840.

Methyl (2-methyl-5-oxo-1-(*p*-tolyl)pyrrolidine-2-carbonyl)tryptophanate (**4f**): Cream viscous oil (yield, 260 mg, 60%);  $^1\text{H}$  NMR (500 MHz, Chloroform-*d*)  $\delta$  1.34 (s, 3H), 1.86 – 2.20 (m, 2H), 2.29 (s, 3H), 2.48 (m, 1H), 2.70 (m, 1H), 3.28 (m, 1H), 3.38 (m, 1H), 3.77 (s, 3H), 4.88 (m, 1H), 6.52 (brs, 1H), 6.79 – 6.93 (m, 3H), 7.07 – 7.15 (m, 3H), 7.24 (m, 1H), 7.34 (d,  $J = 8.1$  Hz, 1H), 7.44 (d,  $J = 8.0$  Hz, 1H), 8.18 (brs, 1H) ppm;  $^{13}\text{C}$  NMR (75 MHz, Chloroform-*d*)  $\delta$  20.7, 22.2, 26.9, 27.4, 29.6, 33.7, 52.1, 68.2, 109.1, 111.2, 118.2, 119.5, 122.2, 122.6, 125.4, 126.6, 129.3, 132.8, 136.1, 136.5, 171.82, 173.2, 175.4 ppm; IR (KBr):  $\nu$  3270, 1734, 1692, 1648, 1513, 1374, 1201, 819, 741  $\text{cm}^{-1}$ ; HRMS calcd for  $\text{C}_{25}\text{H}_{27}\text{N}_3\text{O}_4$  [ $\text{M} + \text{Na}$ ] $^{+}$  456.1899; Found: 456.1894.

Methyl (2-methyl-5-oxo-1-phenylpyrrolidine-2-carbonyl)leucinate (**4g**): Cream solid (yield, 218 mg, 63%); mp: 107 – 108  $^{\circ}\text{C}$ ;  $^1\text{H}$  NMR (500 MHz, Chloroform-*d*)  $\delta$  0.92 – 0.97 (m, 6H), 1.50 (s, 3H), 1.54 (m, 1H), 1.69 (m, 1H), 2.10 (m, 1H), 2.52 (m, 1H), 2.56 – 2.76 (m, 2H), 2.88 (m, 1H), 3.76 (s, 3H), 4.65 (m, 1H), 6.37 (d,  $J = 8.2$  Hz, 1H), 7.25 – 7.45 (m, 5H) ppm;  $^{13}\text{C}$  NMR (126 MHz, Chloroform-*d*)  $\delta$  21.45, 22.8, 23.0, 25.0, 30.3, 34.3, 40.8, 51.1, 52.4, 68.6, 125.4, 127.1, 129.0, 136.0, 173.0, 173.6, 175.5 ppm; IR (KBr):  $\nu$  3308, 1755, 1739, 1694, 1597, 1534, 1381, 1222, 1020, 764, 697  $\text{cm}^{-1}$ ; Anal. calcd for  $\text{C}_{19}\text{H}_{26}\text{N}_2\text{O}_4$  (346.1893) C, 65.87; H, 7.56; N, 8.09; Found: C, 65.52; H, 8.0; N, 7.71%.

Methyl (1-(4-chlorophenyl)-2-methyl-5-oxopyrrolidine-2-carbonyl)leucinate (**4h**): Creamy viscous oil (yield, 140 mg, 37%);  $^1\text{H}$  NMR (500 MHz, Chloroform-*d*)  $\delta$  0.91 – 0.94 (m, 6H), 1.48 (s, 3H), 1.61 (m, 1H), 1.67 (m, 1H), 2.10 (m, 1H), 2.47 (m, 1H), 2.61 (m, 1H), 2.67 (m, 1H), 2.73 (m, 1H), 3.75 (s, 3H), 4.63 (m, 1H), 6.69 (d,  $J$  = 8.4 Hz, 1H), 7.24 – 7.39 (m, 4H) ppm;  $^{13}\text{C}$  NMR (126 MHz, Chloroform-*d*)  $\delta$  21.4, 22.7, 25.0, 27.5, 30.30, 34.1, 40.5, 51.1, 52.4, 68.4, 126.7, 129.1, 132.3, 134.6, 173.0, 173.3, 175.6 ppm; IR (KBr):  $\nu$  3327, 1743, 1700, 1671, 1526, 1495, 1367, 1199, 828  $\text{cm}^{-1}$ ; HRMS calcd for  $\text{C}_{19}\text{H}_{25}\text{ClN}_2\text{O}_4$   $[\text{M} + \text{Na}]^+$  403.1401; Found: 403.1395.

Methyl (2-methyl-5-oxo-1-(*p*-tolyl)pyrrolidine-2-carbonyl)leucinate (**4i**): Cream solid (yield, 234 mg, 65%); mp: 108 – 110  $^\circ\text{C}$ ;  $^1\text{H}$  NMR (500 MHz, Chloroform-*d*)  $\delta$  0.90 – 0.98 (m, 6H), 1.48 (s, 3H), 1.57 (m, 1H), 1.69 (m, 1H), 2.09 (m, 1H), 2.36 (s, 3H), 2.48 – 2.61 (m, 2H), 2.69 (m, 1H), 2.87 (m, 1H), 3.75 (s, 3H), 4.63 (m, 1H), 6.49 (d,  $J$  = 8.2 Hz, 1H), 7.16 – 7.30 (m, 4H) ppm;  $^{13}\text{C}$  NMR (126 MHz, Chloroform-*d*)  $\delta$  21.0, 21.5, 22.8, 22.9, 24.9, 30.3, 34.3, 40.7, 51.1, 52.3, 68.5, 126.4, 129.7, 133.5, 137.1, 173.05, 173.7, 175.7 ppm; IR (KBr):  $\nu$  3289, 1748, 1674, 1609, 1537, 1387, 1221, 817  $\text{cm}^{-1}$ ; HRMS calcd for  $\text{C}_{20}\text{H}_{28}\text{N}_2\text{O}_4$   $[\text{M} + \text{Na}]^+$  383.1947; Found: 383.1942.

Methyl (1-(2-(1H-indol-3-yl)ethyl)-2-methyl-5-oxopyrrolidine-2-carbonyl)leucinate (**4j**): Creamy viscous oil (yield, 120 mg, 29%);  $^1\text{H}$  NMR (500 MHz, Chloroform-*d*)  $\delta$  0.89 (d,  $J$  = 6.1 Hz, 6H), 1.23 – 1.34 (m, 2H), 1.56 (s, 3H), 1.98 (m, 1H), 2.37 (m, 1H), 2.46 – 2.51 (m, 2H), 3.06 (m, 1H), 3.13–3.23 (m, 2H), 3.39 (m, 1H), 3.67 (s, 3H), 3.79 (m, 1H), 4.47 (m, 1H), 6.08 (d,  $J$  = 8.0 Hz, 1H), 7.12 – 7.24 (m, 3H), 7.38 (m, 1H), 7.69 (d,  $J$  = 7.9 Hz, 1H), 8.03 (brs, 1H);  $^{13}\text{C}$  NMR (75 MHz, Chloroform-*d*)  $\delta$  21.5, 22.6, 22.7, 24.5, 24.9, 29.6, 33.2, 40.3, 42.3, 50.9, 52.2, 67.6, 111.1, 112.7, 118.7, 119.3, 121.9, 122.08, 127.2, 136.2, 173.0, 174.1, 176.3 ppm; IR (KBr):  $\nu$  3297, 1743, 1672, 1654, 1555, 1407, 1339, 1227, 760  $\text{cm}^{-1}$ ; HRMS calcd for  $\text{C}_{23}\text{H}_{31}\text{N}_3\text{O}_4$   $[\text{M} + \text{Na}]^+$  436.2212; Found . 436.2207; Anal. calcd for  $\text{C}_{23}\text{H}_{31}\text{N}_3\text{O}_4$  (413.2315) C, 66.81; H, 7.56; N, 10.16; Found: C, 67.05; H, 7.63; N, 9.75%.

Methyl (1-(4-fluorophenyl)-2-methyl-5-oxopyrrolidine-2-carbonyl)leucinate (**4k**): Viscous oil (yield, 255 mg, 70%);  $^1\text{H}$  NMR (500 MHz, Chloroform-*d*)  $\delta$  0.90 – 0.96 (m, 6H), 1.47 (s, 3H), 1.53 – 1.63 (m, 2H), 1.65 – 1.71 (m, 1H), 2.08 (m, 1H), 2.46 – 2.59 (m, 2H), 2.65 – 2.76 (m, 1H), 3.75 (s, 3H), 4.63 (m, 1H), 6.56 (d,  $J$  = 8.2 Hz, 1H), 7.04 – 7.12 (m, 2H), 7.26 (m, 1H), 7.38 (m, 1H) ppm;  $^{13}\text{C}$  NMR (126 MHz, Chloroform-*d*)  $\delta$  21.4, 22.8, 25.04, 27.6, 30.2, 34.1, 40.6, 51.1, 52.4, 68.4, 115.8 ( $^2J_{\text{C-F}}$  = 22 Hz), 127.7 ( $^3J_{\text{C-F}}$  = 8.2 Hz), 131.9, 160.1 ( $^2J_{\text{C-F}}$  = 247 Hz), 173.0, 173.2, 175.8 ppm; IR (KBr):  $\nu$  3331, 1745, 1698, 1670, 1511, 1369, 1219, 838  $\text{cm}^{-1}$ ; HRMS calcd for  $\text{C}_{19}\text{H}_{25}\text{FN}_2\text{O}_4$   $[\text{M} + \text{Na}]^+$  387.1696; Found: 387.1693.

Methyl (1-(3-methoxyphenyl)-2-methyl-5-oxopyrrolidine-2-carbonyl)leucinate (**4l**): Cream solid (yield 218 mg, 58%); mp: 98 – 99  $^\circ\text{C}$ ;  $^1\text{H}$  NMR (500 MHz, Chloroform-*d*)  $\delta$  0.91 – 0.96 (m, 6H), 1.51 (s, 3H), 1.60 – 1.71 (m, 3H), 2.11 (m, 1H), 2.48 – 2.61 (m, 2H), 2.71 (m, 1H), 3.75 (s, 3H), 3.80 (s, 3H), 4.64 (m, 1H), 6.45 (d,  $J$  = 8.3 Hz, 1H), 6.80 – 6.97 (m, 3H), 7.27 (m,

1H) ppm;  $^{13}\text{C}$  NMR (126 MHz, Chloroform-*d*)  $\delta$  21.4, 21.5, 22.9, 24.9, 30.4, 34.4, 40.6, 51.2, 52.3, 55.4, 68.6, 111.7, 112.4, 117.5, 129.6, 137.1, 160.1, 172.9, 173.5, 175.5 ppm; IR (KBr):  $\nu$  3295, 1746, 1673, 1537, 1392, 1213, 1037, 699  $\text{cm}^{-1}$ ; Anal. calcd for  $\text{C}_{20}\text{H}_{28}\text{N}_2\text{O}_5$  (376.1998) C, 63.81; H, 7.50; N, 7.44; Found: C, 63.68; H, 7.91; N, 7.10%.

Methyl (1-(4-hydroxyphenyl)-2-methyl-5-oxopyrrolidine-2-carbonyl)leucinate (**4m**): Cream solid (yield, 220 mg, 61%); mp: 165 – 169 °C;  $^1\text{H}$  NMR (500 MHz, Chloroform-*d*)  $\delta$  0.90 – 0.96 (m, 6H), 1.48 (s, 3H), 1.52 – 1.72 (m, 3H), 2.07 (m, 1H), 2.50 – 2.62 (m, 2H), 2.78 (m, 1H), 3.75 (s, 3H), 4.66 (m, 1H), 6.31 (d,  $J$  = 8.1 Hz, 1H), 6.63 (d,  $J$  = 8.8 Hz, 2H), 6.97 (d,  $J$  = 8.8 Hz, 2H) ppm;  $^{13}\text{C}$  NMR (126 MHz, Chloroform-*d*)  $\delta$  21.5, 21.7, 22.8, 24.9, 30.3, 33.7, 41.0, 51.2, 51.3, 68.7, 116.3, 127.4, 155.8, 173.0, 173.2, 176.7 ppm; IR (KBr):  $\nu$  3600 – 2600 (–OH and –NH), 1746, 1681, 1644, 1517, 1391, 1275, 1228, 833  $\text{cm}^{-1}$ ; HRMS calcd for  $\text{C}_{19}\text{H}_{26}\text{N}_2\text{O}_5$   $[\text{M} + \text{Na}]^+$  385.1739; Found: 385.1739.

Methyl (2-methyl-5-oxo-1-phenylpyrrolidine-2-carbonyl)phenylalaninate (**4n**): White crystalline solid (yield, 230 mg, 60%); mp: 129 – 130 °C;  $^1\text{H}$  NMR (500 MHz, Chloroform-*d*)  $\delta$  1.34 (s, 3H), 1.92 (m, 1H), 2.27 (m, 1H), 2.43 (m, 1H), 2.52 (m, 1H), 3.00 (m, 1H), 3.29 (m, 1H), 3.78 (s, 3H), 4.93 (m, 1H), 6.99 (brs, 1H), 7.00 – 7.13 (m, 2H), 7.20 – 7.38 (m, 8H) ppm;  $^{13}\text{C}$  NMR (126 MHz, Chloroform-*d*)  $\delta$  22.7, 23.0, 30.0, 34.3, 36.7, 53.2, 68.4, 126.0, 126.1, 126.7, 127.1, 128.7, 128.9, 136.0, 136.2, 171.9, 173.8, 175.7 ppm; IR (KBr):  $\nu$  3304, 1741, 1692, 1678, 1530, 1381, 1233, 1029, 700  $\text{cm}^{-1}$ ; Anal. calcd for  $\text{C}_{22}\text{H}_{24}\text{N}_2\text{O}_4$  (380.1736) C, 69.46; H, 6.36; N, 7.36; Found: C, 69.69; H, 6.50; N, 7.30%.

Methyl (1-(4-chlorophenyl)-2-methyl-5-oxopyrrolidine-2-carbonyl)phenylalaninate (**4o**): Viscous Oil (yield, 224 mg, 54%);  $^1\text{H}$  NMR (500 MHz, Chloroform-*d*)  $\delta$  1.38 (s, 3H), 2.38 (m, 1H), 2.62 (m, 1H), 2.69 (m, 1H), , 2.75 (m, 1H), 3.02 (m, 1H), 3.30 (m, 1H), 3.82 (s, 3H), 4.93 (m, 1H), 6.61 (d,  $J$  = 7.9 Hz, 1H, –NH), 6.95 (d,  $J$  = 7.8 Hz, 1H), 7.02– 7.12 (m, 2H), 7.17 – 7.42 (m, 6H) ppm;  $^{13}\text{C}$  NMR (126 MHz, Chloroform-*d*)  $\delta$  22.5, 27.6, 29.7, 34.2, 37.7, 53.1, 68.40, 127.18, 127.3, 127.7, 128.8, 129.2, 132.7, 134.4, 135.88, 173.3, 175.7, 176.6 ppm; IR (KBr):  $\nu$  3272, 1740, 1652, 1654, 1396, 1223, 704  $\text{cm}^{-1}$ ; Anal. calcd for  $\text{C}_{22}\text{H}_{23}\text{ClN}_2\text{O}_4$  (414.1346) C, 63.69; H, 5.59; N, 6.75; Found: C, 63.30; H, 5.72; N, 6.40%.

Methyl (1-(4-hydroxyphenyl)-2-methyl-5-oxopyrrolidine-2-carbonyl)phenylalaninate (**4p**): Cream solid (yield, 218 mg, 55%); mp: 144 – 147 °C;  $^1\text{H}$  NMR (500 MHz, Chloroform-*d*)  $\delta$  1.36 (s, 3H), 1.99 (m, 1H), 2.10 (m, 1H), 2.34 – 2.55 (m, 2H), 3.05 (m, 1H), 3.23 (m, 1H), 3.77 (s, 3H), 4.87 (m, 1H), 6.36 (d,  $J$  = 7.7 Hz, 1H), 6.77 (m, 2H), 6.82 – 7.20 (m, 5H), 7.23 – 7.32 (m, 3H) ppm;  $^{13}\text{C}$  NMR (126 MHz, Chloroform-*d*)  $\delta$  22.8, 30.0, 33.6, 37.2, 52.5, 53.2, 68.6, 116.4, 127.4, 128.4, 128.6, 128.8, 128.9, 135.5, 155.7, 171.7, 173.0, 176.6 ppm; IR (KBr):  $\nu$  3600 – 2500 (OH and NH), 1742, 1685, 1650, 1515, 1387, 1221, 837, 700  $\text{cm}^{-1}$ ; HRMS calcd for  $\text{C}_{22}\text{H}_{24}\text{N}_2\text{O}_5$   $[\text{M} + \text{Na}]^+$  419.1583; Found: 419.1577.

CC1(C)CC(=O)N1C(=O)C2C=C3C(=C2)C(=C4C(=C3)C(=C5C(=C4)C(=C6C(=C5)C(=C7C(=C6)C(=C8C(=C7)C(=C9C(=C8)C(=C10C(=C9)C(=C11C(=C10)C(=C12C(=C11)C(=C13C(=C12)C(=C14C(=C13)C(=C15C(=C14)C(=C16C(=C15)C(=C17C(=C16)C(=C18C(=C17)C(=C19C(=C18)C(=C20C(=C19)C(=C21C(=C20)C(=C22C(=C21)C(=C23C(=C22)C(=C24C(=C23)C(=C25C(=C24)C(=C26C(=C25)C(=C27C(=C26)C(=C28C(=C27)C(=C29C(=C28)C(=C30C(=C29)C(=C31C(=C30)C(=C32C(=C31)C(=C33C(=C32)C(=C34C(=C33)C(=C35C(=C34)C(=C36C(=C35)C(=C37C(=C36)C(=C38C(=C37)C(=C39C(=C38)C(=C40C(=C39)C(=C41C(=C40)C(=C42C(=C41)C(=C43C(=C42)C(=C44C(=C43)C(=C45C(=C44)C(=C46C(=C45)C(=C47C(=C46)C(=C48C(=C47)C(=C49C(=C48)C(=C50C(=C49)C(=C51C(=C50)C(=C52C(=C51)C(=C53C(=C52)C(=C54C(=C53)C(=C55C(=C54)C(=C56C(=C55)C(=C57C(=C56)C(=C58C(=C57)C(=C59C(=C58)C(=C60C(=C59)C(=C61C(=C60)C(=C62C(=C61)C(=C63C(=C62)C(=C64C(=C63)C(=C65C(=C64)C(=C66C(=C65)C(=C67C(=C66)C(=C68C(=C67)C(=C69C(=C68)C(=C70C(=C69)C(=C71C(=C70)C(=C72C(=C71)C(=C73C(=C72)C(=C74C(=C73)C(=C75C(=C74)C(=C76C(=C75)C(=C77C(=C76)C(=C78C(=C77)C(=C79C(=C78)C(=C80C(=C79)C(=C81C(=C80)C(=C82C(=C81)C(=C83C(=C82)C(=C84C(=C83)C(=C85C(=C84)C(=C86C(=C85)C(=C87C(=C86)C(=C88C(=C87)C(=C89C(=C88)C(=C90C(=C89)C(=C91C(=C90)C(=C92C(=C91)C(=C93C(=C92)C(=C94C(=C93)C(=C95C(=C94)C(=C96C(=C95)C(=C97C(=C96)C(=C98C(=C97)C(=C99C(=C98)C(=C100C(=C99)C(=C101C(=C100)C(=C102C(=C101)C(=C103C(=C102)C(=C104C(=C103)C(=C105C(=C104)C(=C106C(=C105)C(=C107C(=C106)C(=C108C(=C107)C(=C109C(=C108)C(=C110C(=C109)C(=C111C(=C110)C(=C112C(=C111)C(=C113C(=C112)C(=C114C(=C113)C(=C115C(=C114)C(=C116C(=C115)C(=C117C(=C116)C(=C118C(=C117)C(=C119C(=C118)C(=C120C(=C119)C(=C121C(=C120)C(=C122C(=C121)C(=C123C(=C122)C(=C124C(=C123)C(=C125C(=C124)C(=C126C(=C125)C(=C127C(=C126)C(=C128C(=C127)C(=C129C(=C128)C(=C130C(=C129)C(=C131C(=C130)C(=C132C(=C131)C(=C133C(=C132)C(=C134C(=C133)C(=C135C(=C134)C(=C136C(=C135)C(=C137C(=C136)C(=C138C(=C137)C(=C139C(=C138)C(=C140C(=C139)C(=C141C(=C140)C(=C142C(=C141)C(=C143C(=C142)C(=C144C(=C143)C(=C145C(=C144)C(=C146C(=C145)C(=C147C(=C146)C(=C148C(=C147)C(=C149C(=C148)C(=C150C(=C149)C(=C151C(=C150)C(=C152C(=C151)C(=C153C(=C152)C(=C154C(=C153)C(=C155C(=C154)C(=C156C(=C155)C(=C157C(=C156)C(=C158C(=C157)C(=C159C(=C158)C(=C160C(=C159)C(=C161C(=C160)C(=C162C(=C161)C(=C163C(=C162)C(=C164C(=C163)C(=C165C(=C164)C(=C166C(=C165)C(=C167C(=C166)C(=C168C(=C167)C(=C169C(=C168)C(=C170C(=C169)C(=C171C(=C170)C(=C172C(=C171)C(=C173C(=C172)C(=C174C(=C173)C(=C175C(=C174)C(=C176C(=C175)C(=C177C(=C176)C(=C178C(=C177)C(=C179C(=C178)C(=C180C(=C179)C(=C181C(=C180)C(=C182C(=C181)C(=C183C(=C182)C(=C184C(=C183)C(=C185C(=C184)C(=C186C(=C185)C(=C187C(=C186)C(=C188C(=C187)C(=C189C(=C188)C(=C190C(=C189)C(=C191C(=C190)C(=C192C(=C191)C(=C193C(=C192)C(=C194C(=C193)C(=C195C(=C194)C(=C196C(=C195)C(=C197C(=C196)C(=C198C(=C197)C(=C199C(=C198)C(=C200C(=C199)C(=C201C(=C200)C(=C202C(=C201)C(=C203C(=C202)C(=C204C(=C203)C(=C205C(=C204)C(=C206C(=C205)C(=C207C(=C206)C(=C208C(=C207)C(=C209C(=C208)C(=C210C(=C209)C(=C211C(=C210)C(=C212C(=C211)C(=C213C(=C212)C(=C214C(=C213)C(=C215C(=C214)C(=C216C(=C215)C(=C217C(=C216)C(=C218C(=C217)C(=C219C(=C218)C(=C220C(=C219)C(=C221C(=C220)C(=C222C(=C221)C(=C223C(=C222)C(=C224C(=C223)C(=C225C(=C224)C(=C226C(=C225)C(=C227C(=C226)C(=C228C(=C227)C(=C229C(=C228)C(=C230C(=C229)C(=C231C(=C230)C(=C232C(=C231)C(=C233C(=C232)C(=C234C(=C233)C(=C235C(=C234)C(=C236C(=C235)C(=C237C(=C236)C(=C238C(=C237)C(=C239C(=C238)C(=C240C(=C239)C(=C241C(=C240)C(=C242C(=C241)C(=C243C(=C242)C(=C244C(=C243)C(=C245C(=C244)C(=C246C(=C245)C(=C247C(=C246)C(=C248C(=C247)C(=C249C(=C248)C(=C250C(=C249)C(=C251C(=C250)C(=C252C(=C251)C(=C253C(=C252)C(=C254C(=C253)C(=C255C(=C254)C(=C256C(=C255)C(=C257C(=C256)C(=C258C(=C257)C(=C259C(=C258)C(=C260C(=C259)C(=C261C(=C260)C(=C262C(=C261)C(=C263C(=C262)C(=C264C(=C263)C(=C265C(=C264)C(=C266C(=C265)C(=C267C(=C266)C(=C268C(=C267)C(=C269C(=C268)C(=C270C(=C269)C(=C271C(=C270)C(=C272C(=C271)C(=C273C(=C272)C(=C274C(=C273)C(=C275C(=C274)C(=C276C(=C275)C(=C277C(=C276)C(=C278C(=C277)C(=C279C(=C278)C(=C280C(=C279)C(=C281C(=C280)C(=C282C(=C281)C(=C283C(=C282)C(=C284C(=C283)C(=C285C(=C284)C(=C286C(=C285)C(=C287C(=C286)C(=C288C(

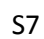



CC1(C)CC(=O)N(C1)c2ccc(Cl)cc2C(=O)NCCc3c[nH]c4ccccc34 **4b**

<sup>1</sup>H NMR spectrum (CDCl<sub>3</sub>) of compound **4b**. The x-axis represents the chemical shift in ppm (f1), ranging from 10.0 to -0.5. The y-axis represents the intensity in arbitrary units (PROTON, CDCl<sub>3</sub>), ranging from -200 to 1400. The spectrum shows several peaks, with integration values provided below the baseline: 0.77, 1.09, 2.20, 8.34, 2.20, 2.09, 1.96, 2.02, 0.97, 1.00, 5.96, 2.11, 2.01, 0.99, 1.12, 1.06, 2.44, 2.44, 2.22, 7.25.

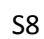

**4c:** Methyl (1-(2-chlorobenzyl)-2-methyl-5-oxopyrrolidine-2-carbonyl)tryptophanate

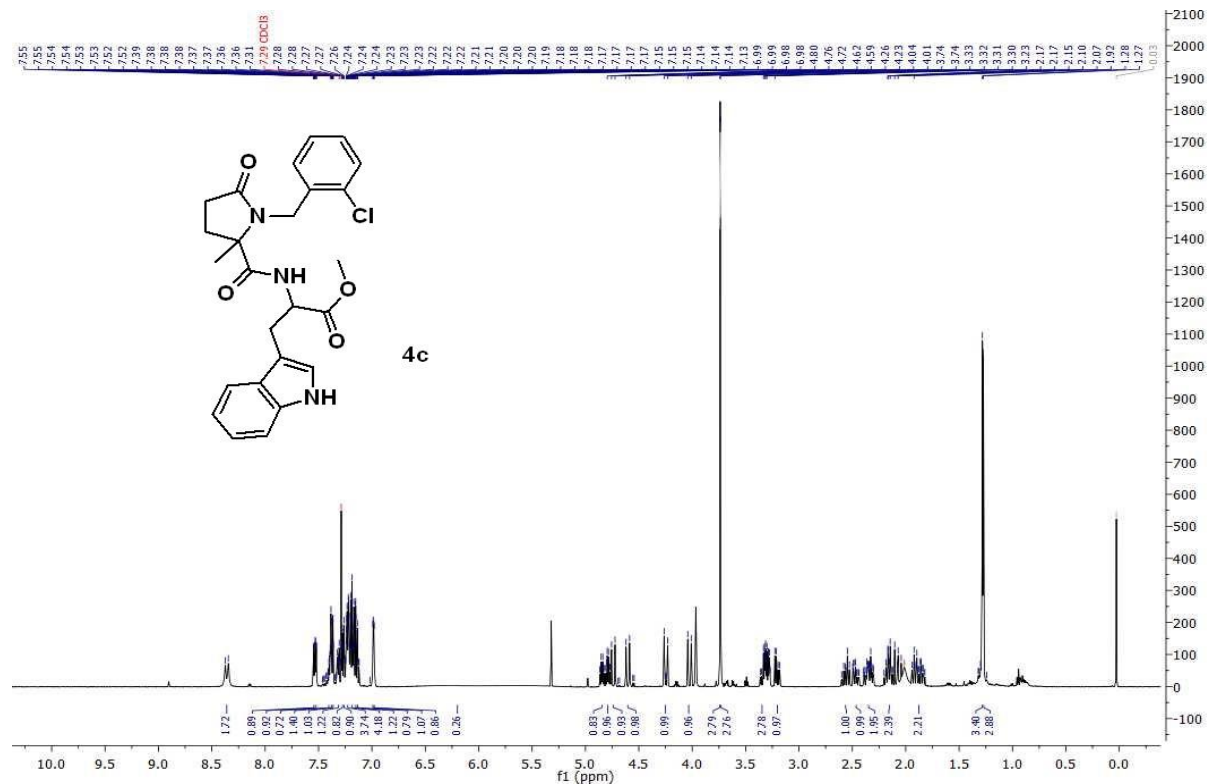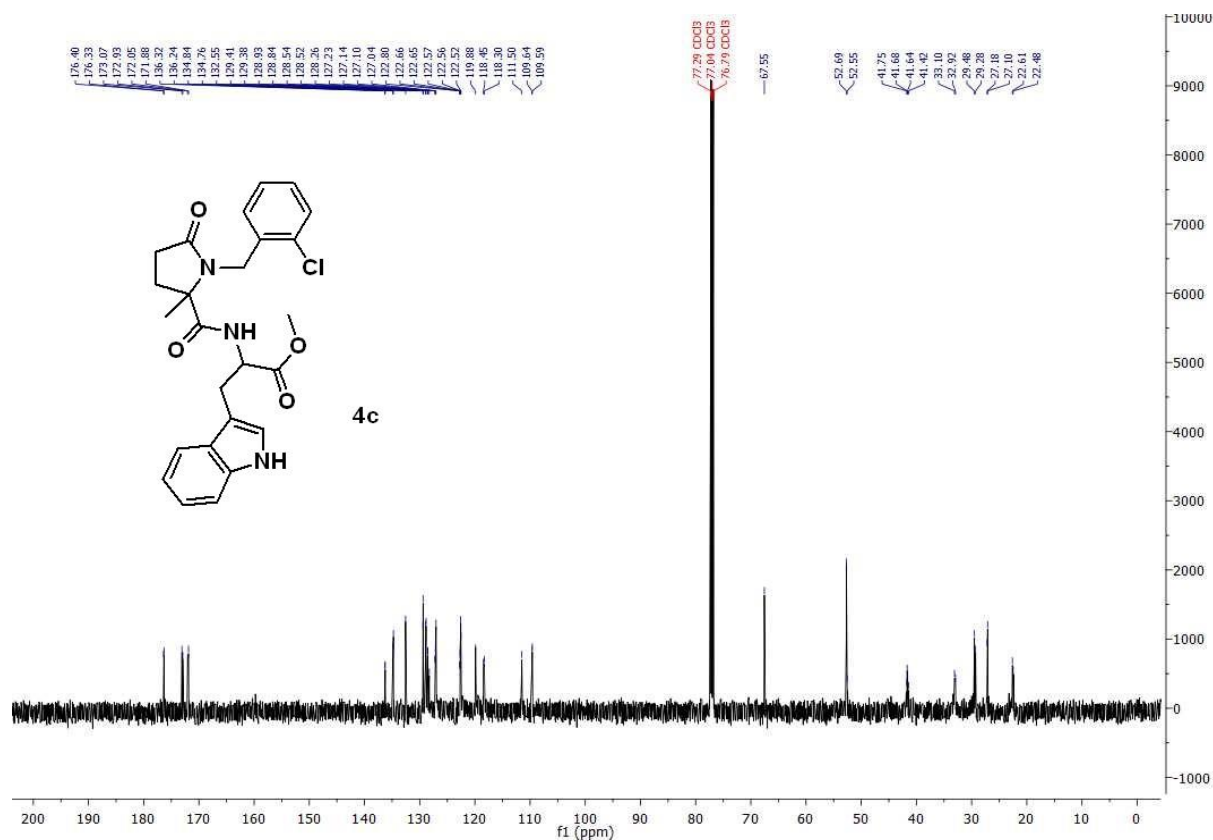

# **4d: Methyl (1-(4-fluorophenyl)-2-methyl-5-oxopyrrolidine-2-carbonyl)tryptophan**

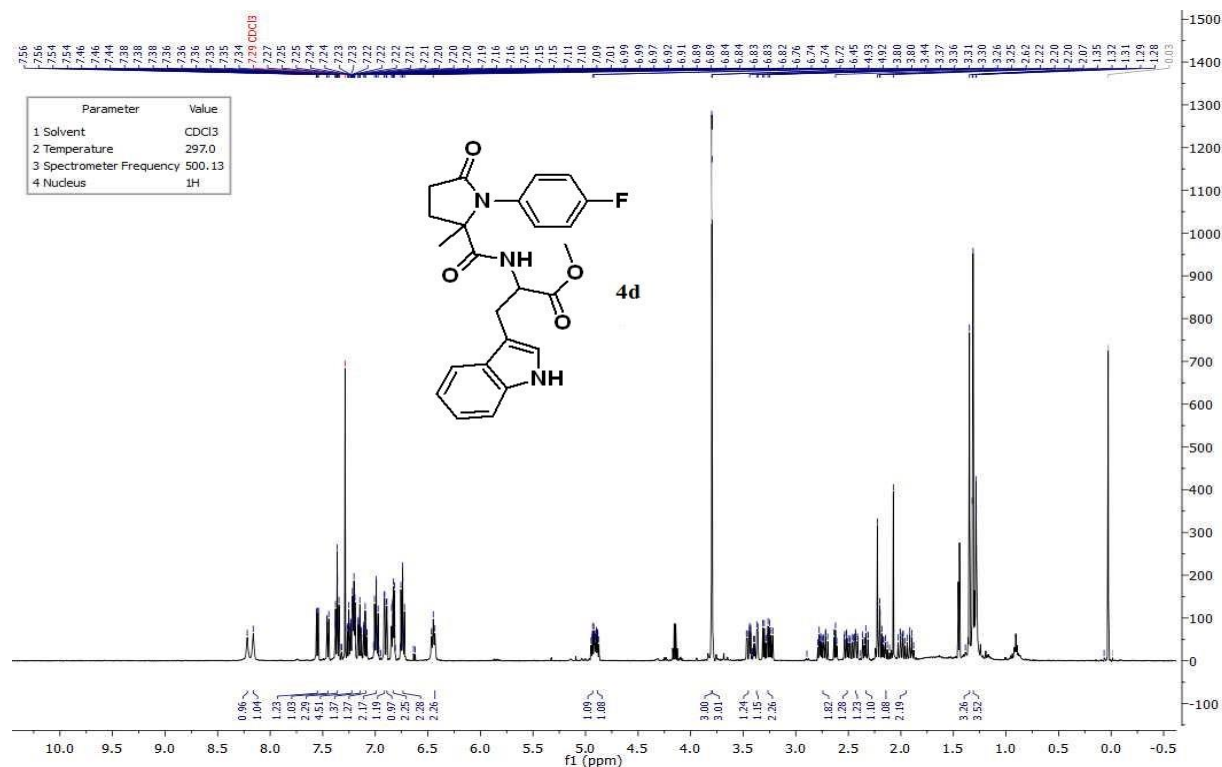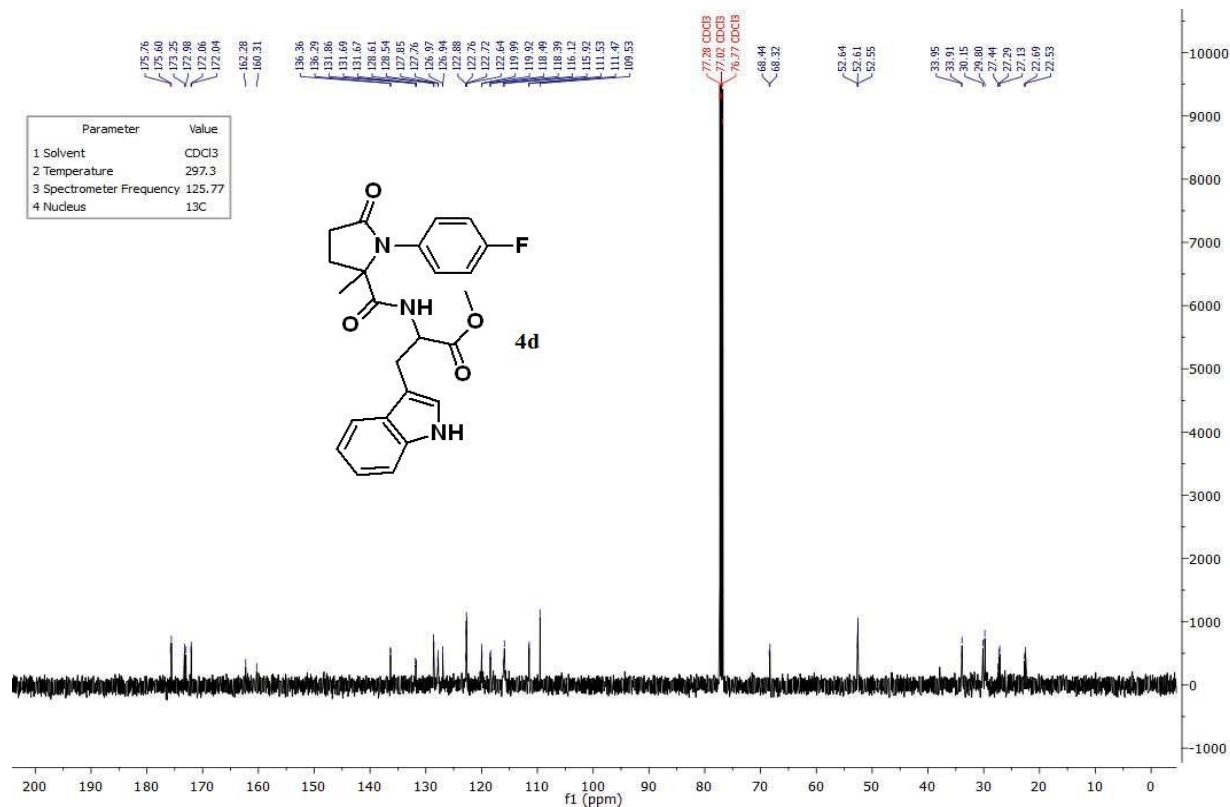

# 4e: Methyl (1-(3-methoxyphenyl)-2-methyl-5-oxopyrrolidine-2-carbonyl)tryptophanate

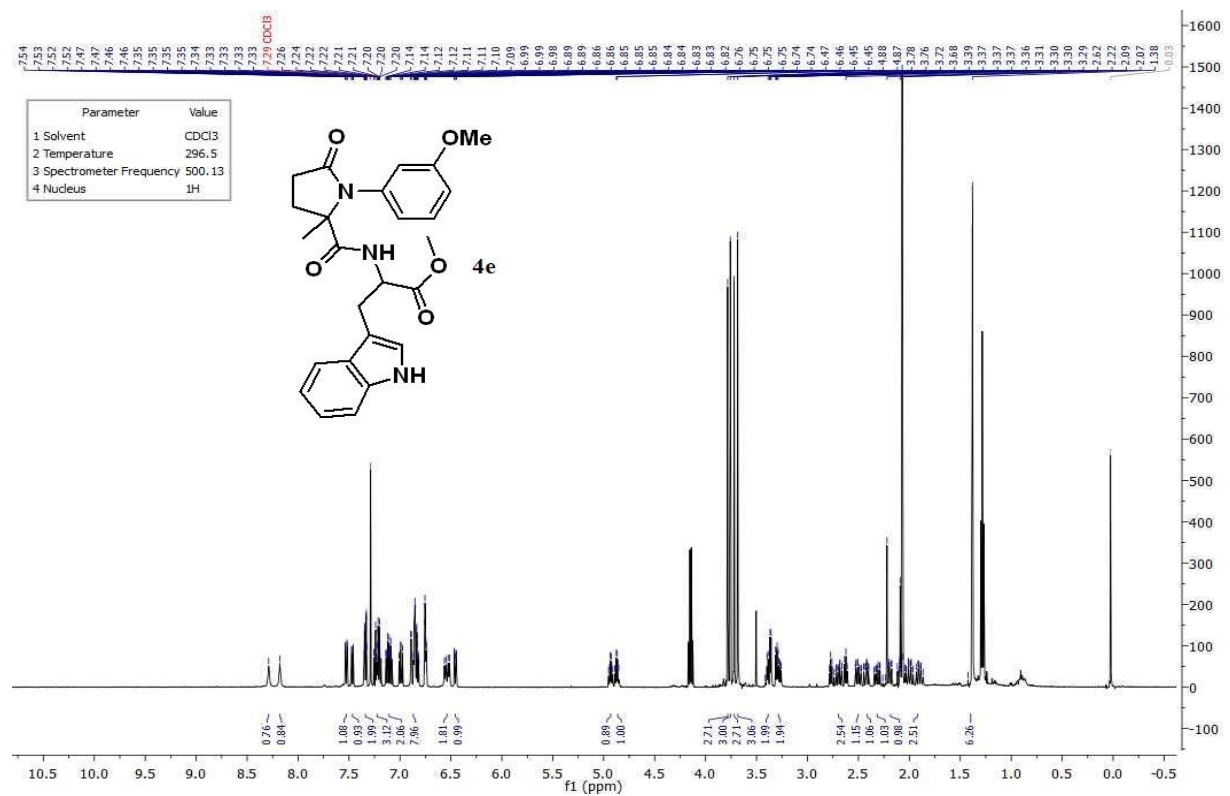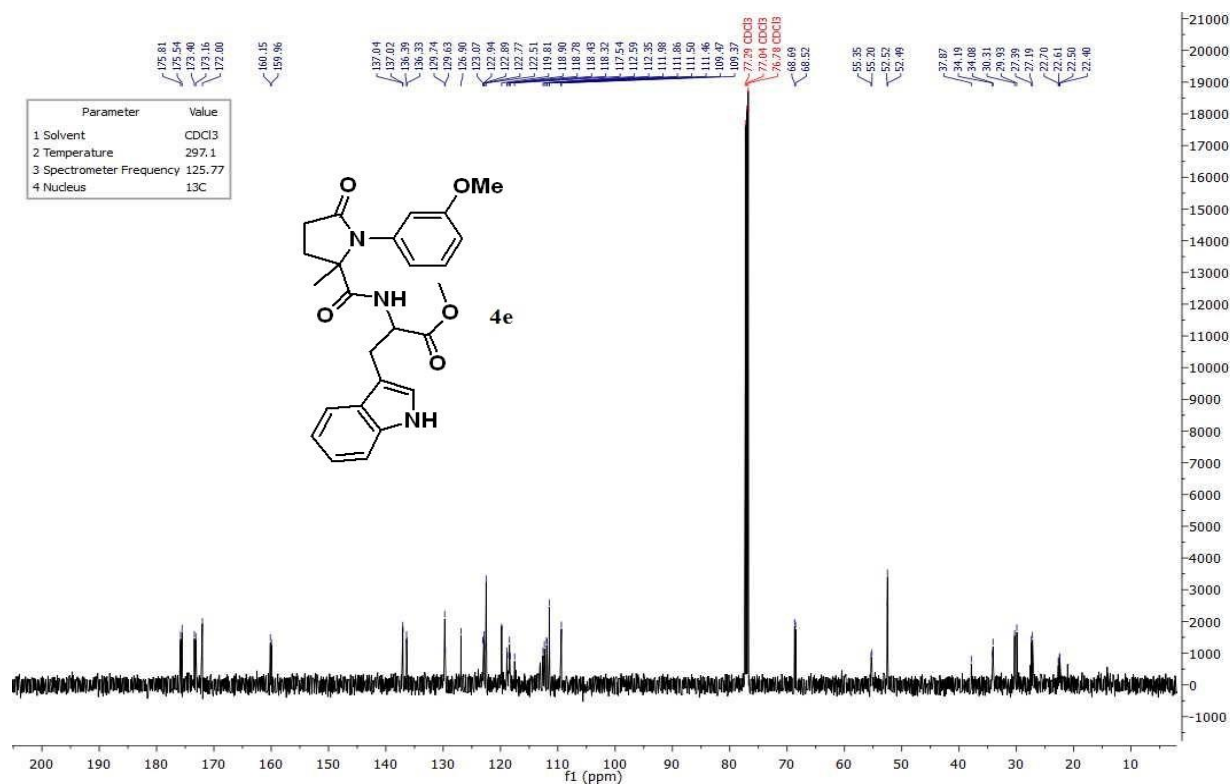

**4f:** Methyl (2-methyl-5-oxo-1-(*p*-tolyl)pyrrolidine-2-carbonyl)tryptophanate

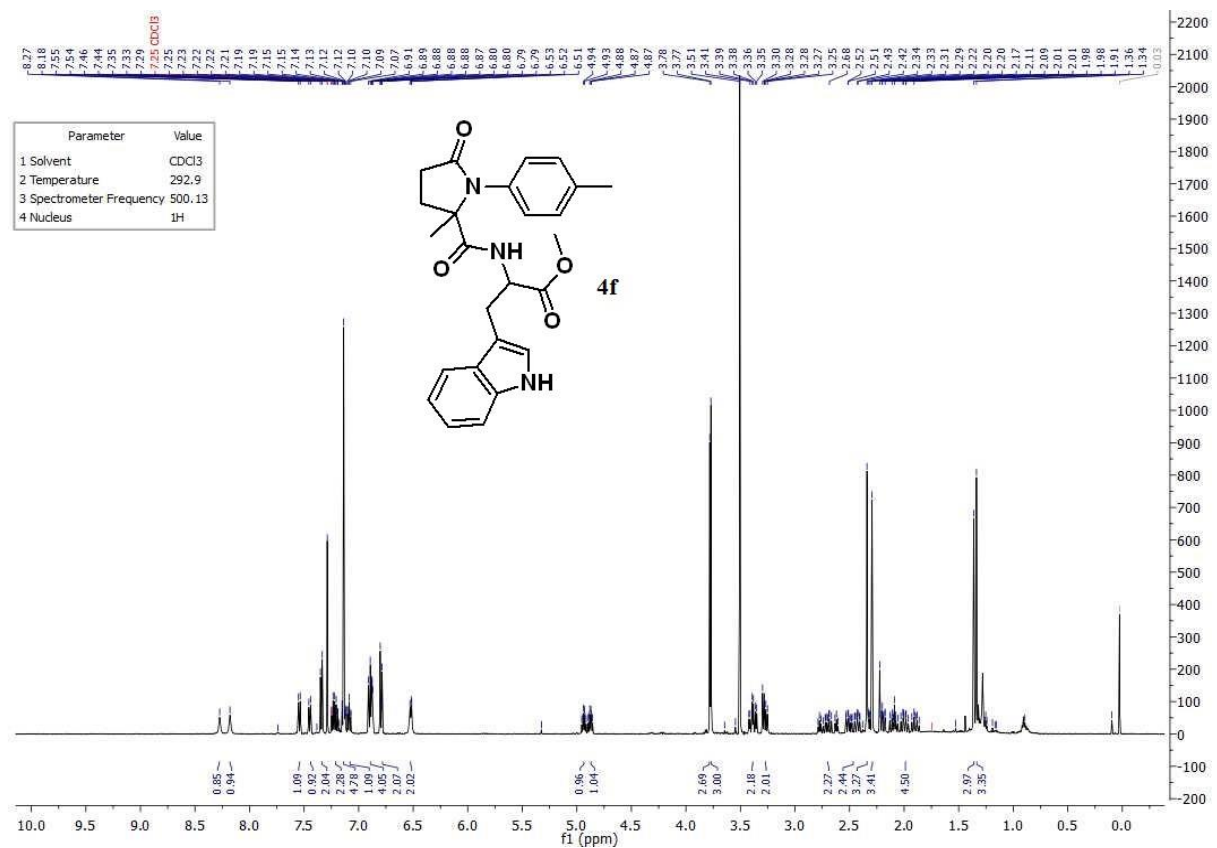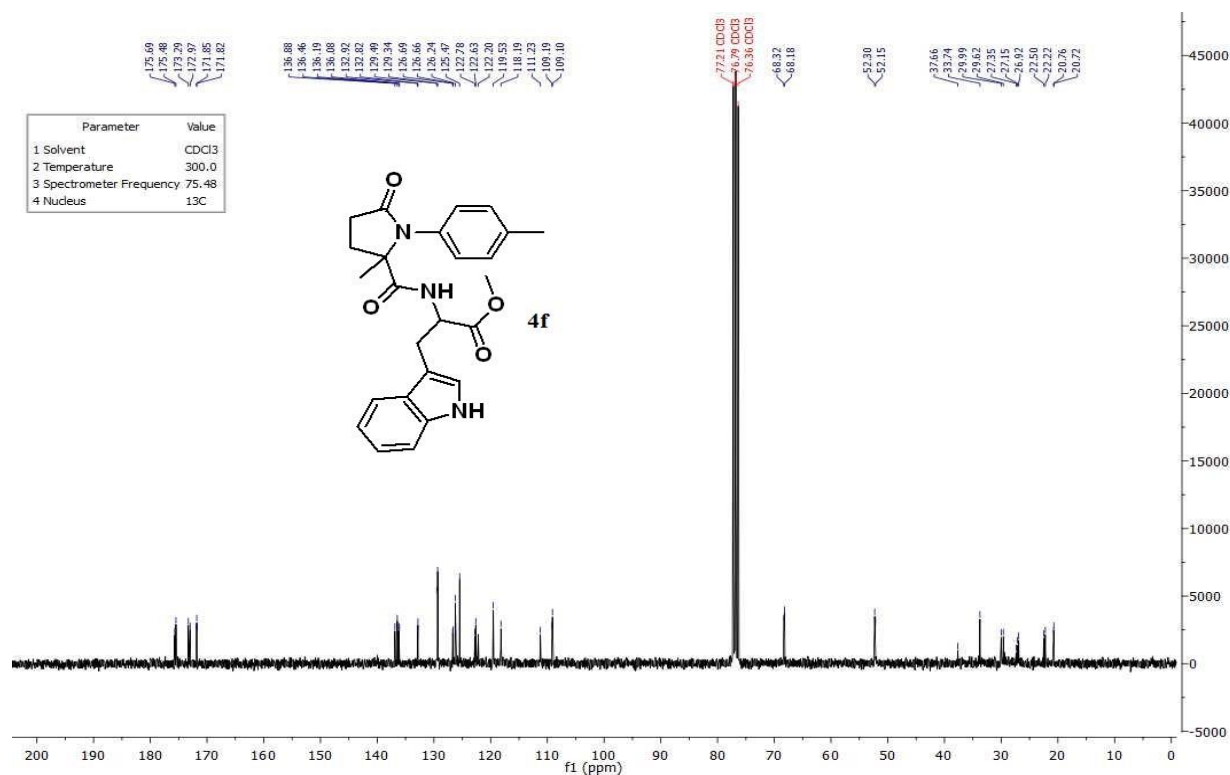

**4g: Methyl (2-methyl-5-oxo-1-phenylpyrrolidine-2-carbonyl)leucinate**

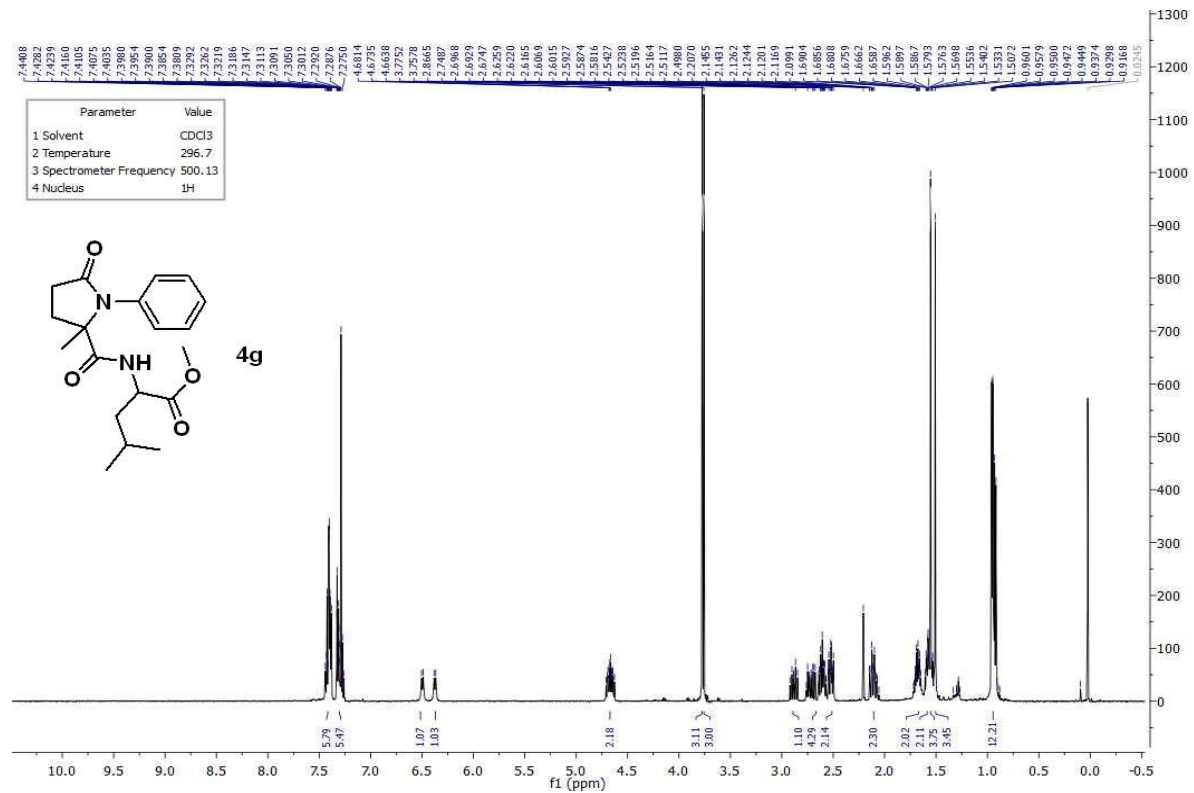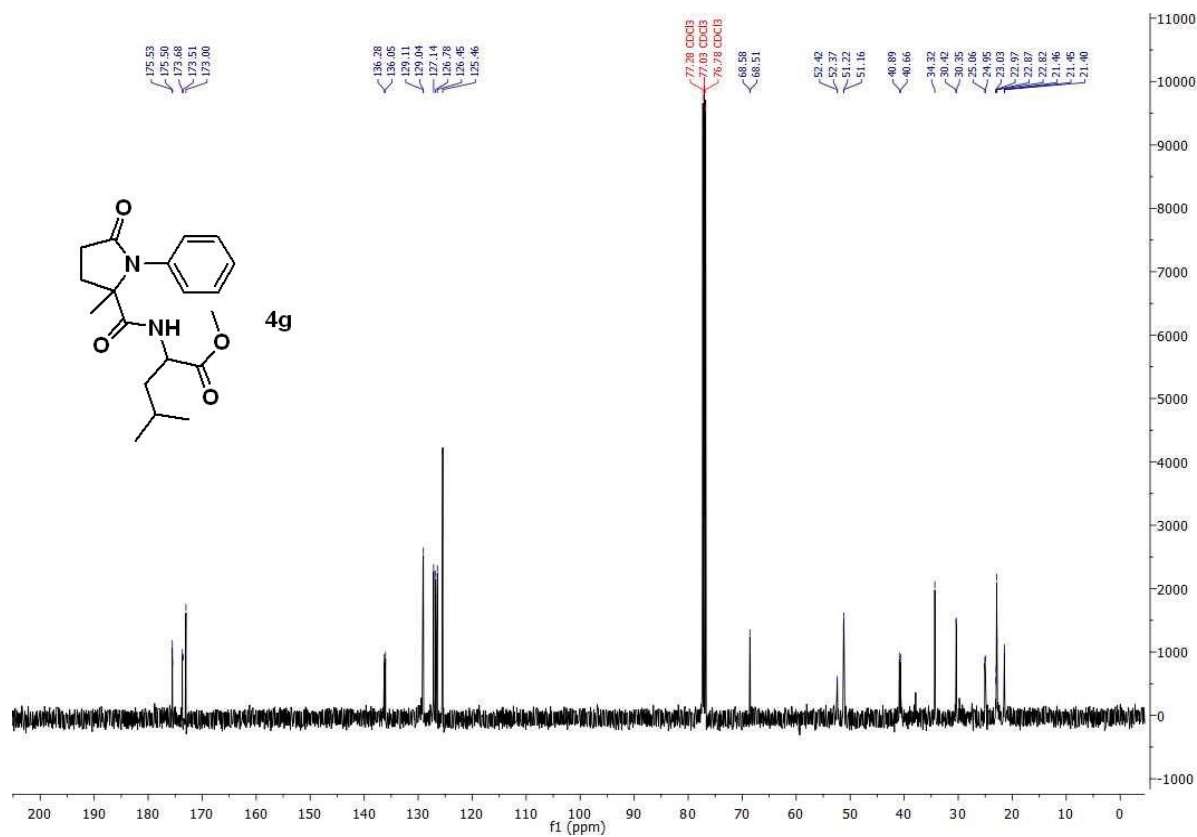



**4h:** Methyl (1-(4-chlorophenyl)-2-methyl-5-oxopyrrolidine-2-carbonyl)leucinate

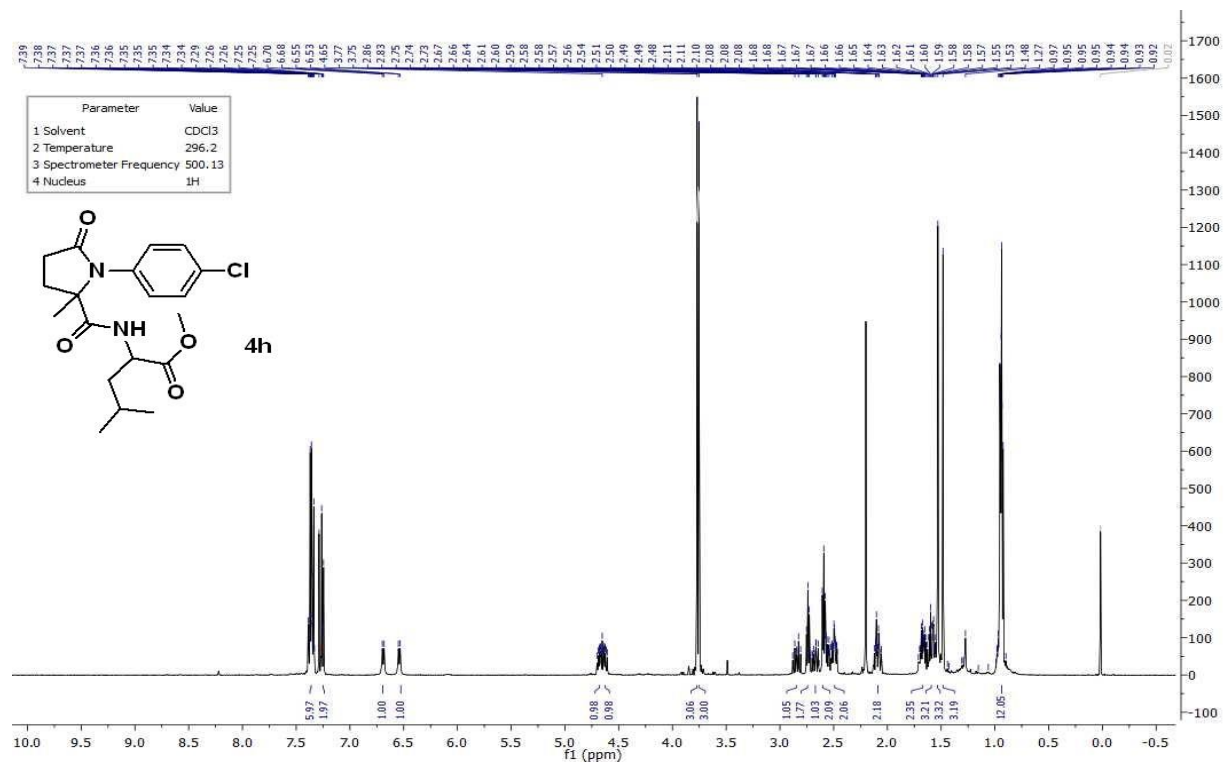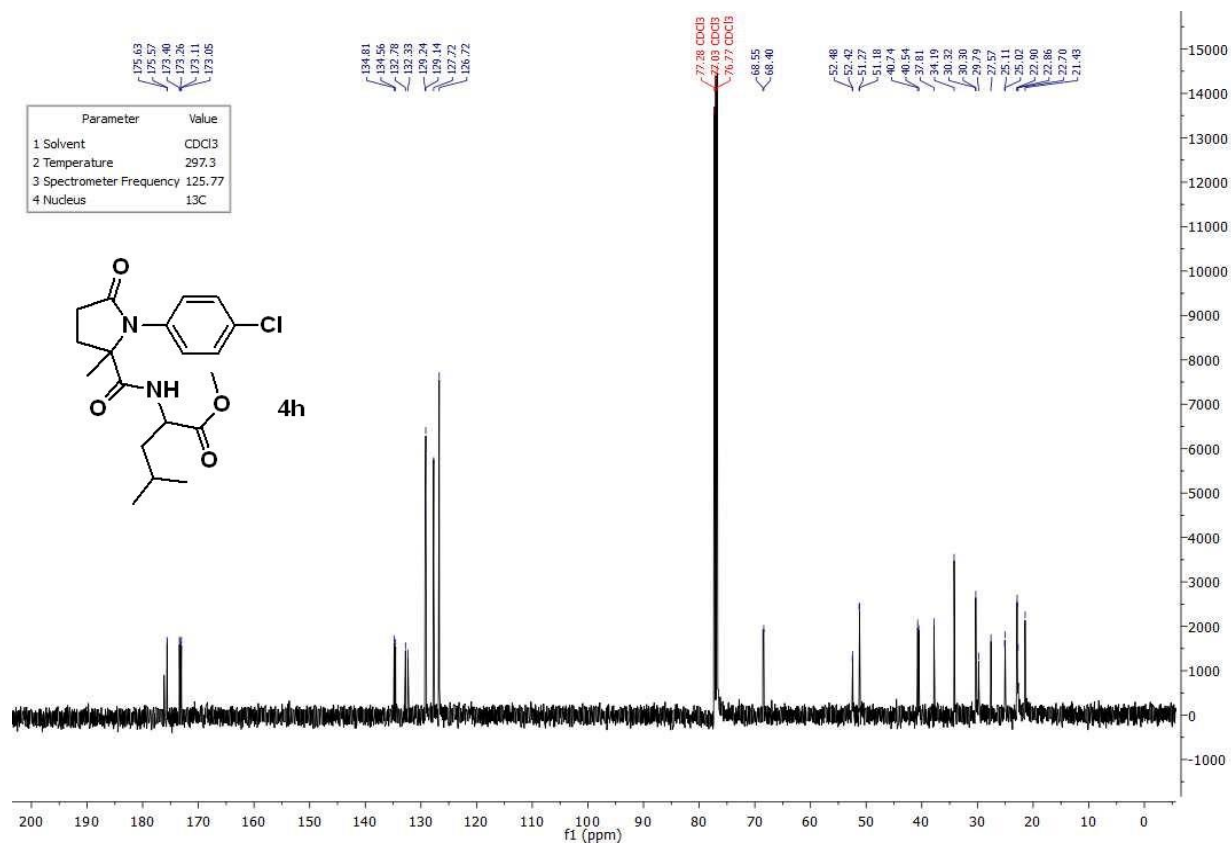

**4i:** Methyl (2-methyl-5-oxo-1-(p-tolyl)pyrrolidine-2-carbonyl)leucinate

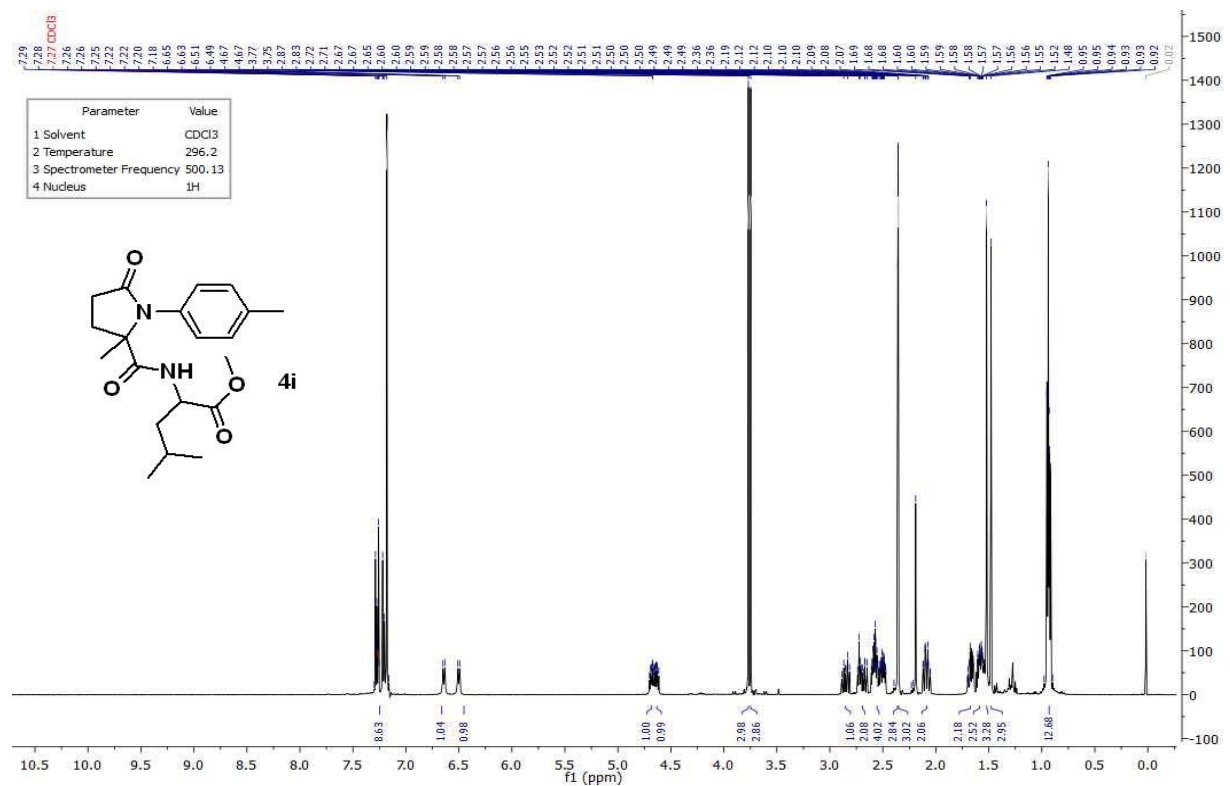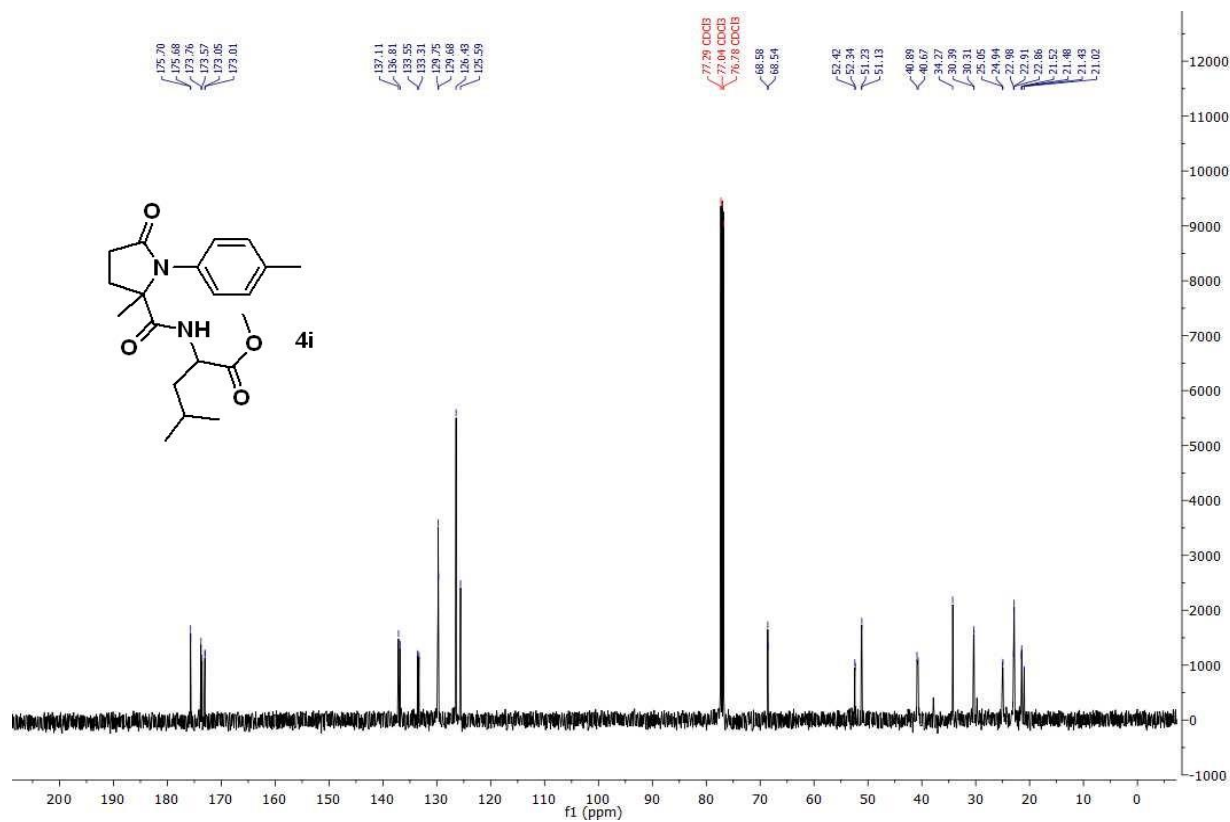



**4j:** Methyl (1-(2-(1H-indol-3-yl)ethyl)-2-methyl-5-oxopyrrolidine-2-carbonyl)leucinate

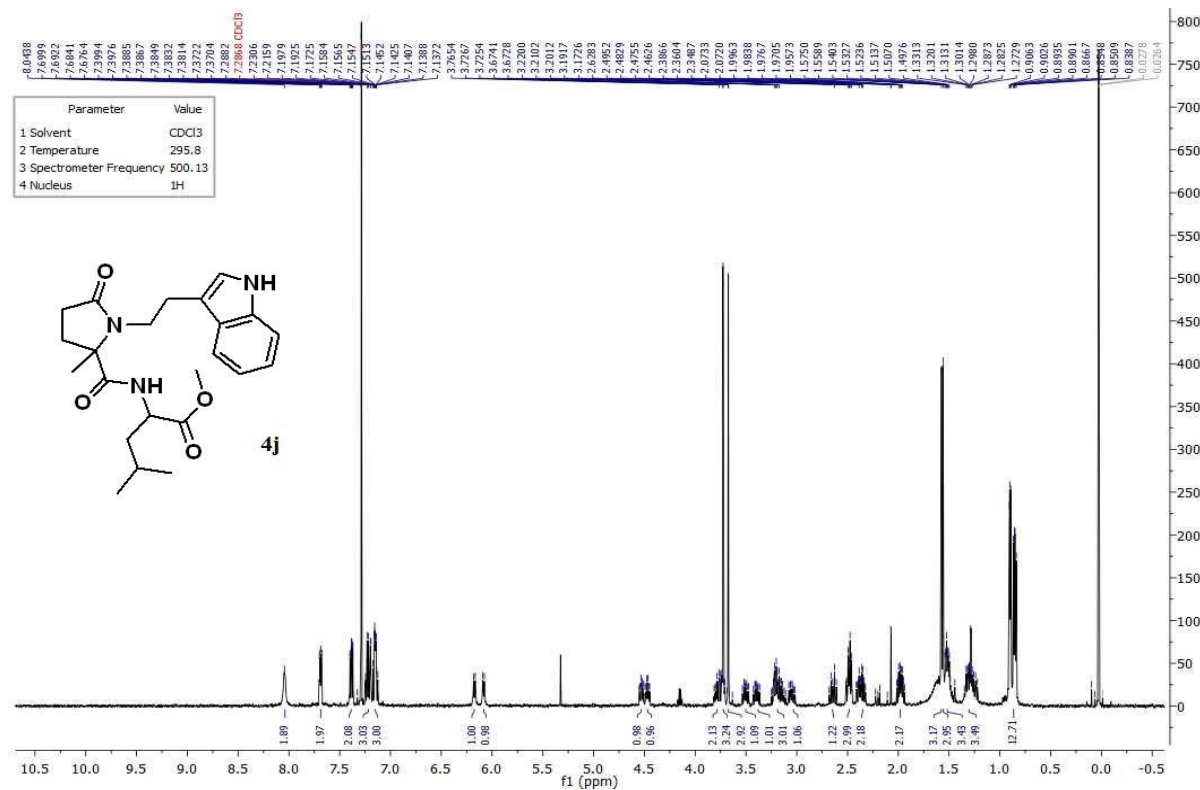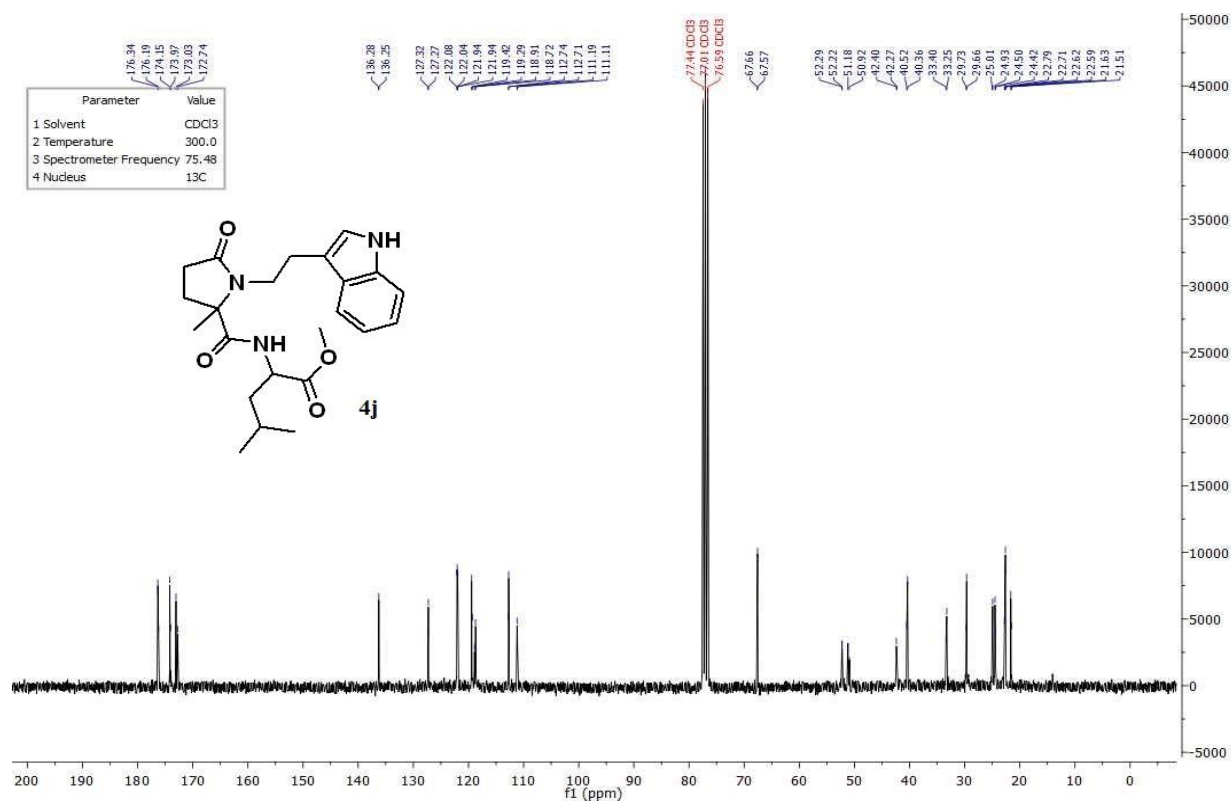

**4k:** Methyl (1-(4-fluorophenyl)-2-methyl-5-oxopyrrolidine-2-carbonyl)leucinate

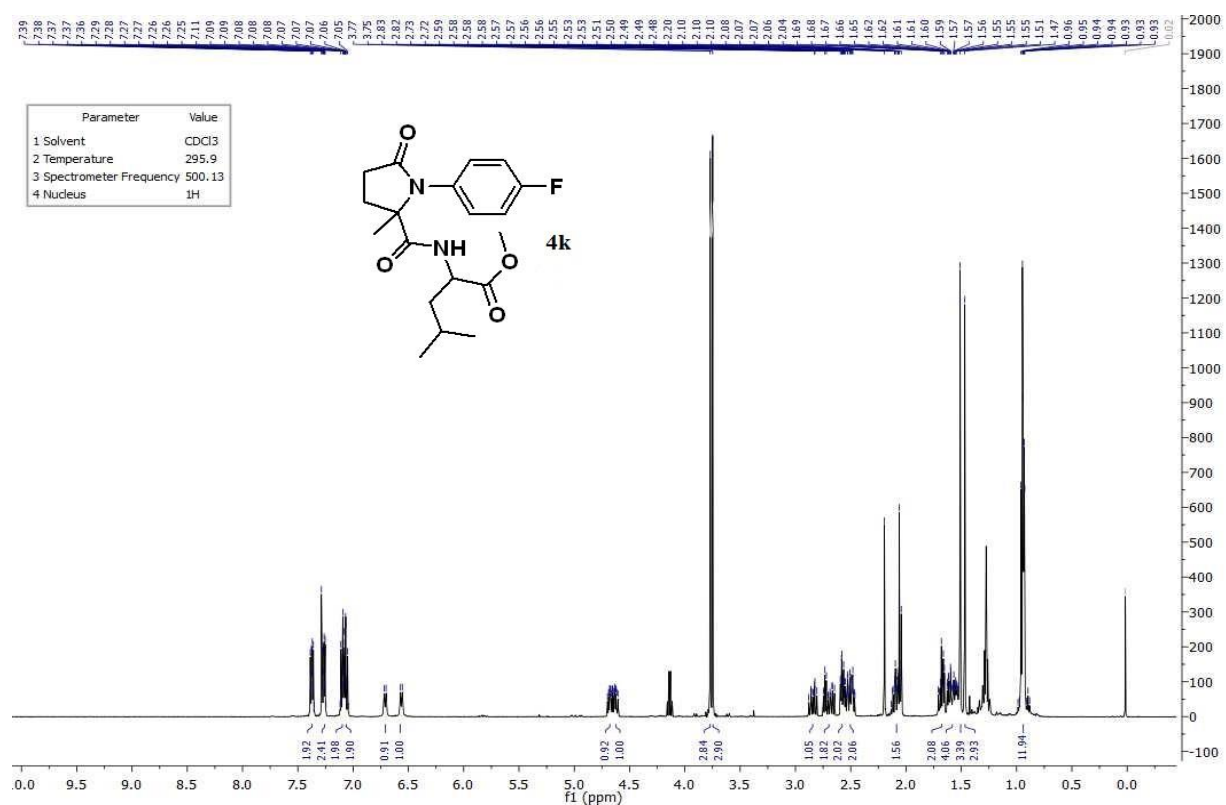

**4l:** Methyl (1-(3-methoxyphenyl)-2-methyl-5-oxopyrrolidine-2-carbonyl)leucinate

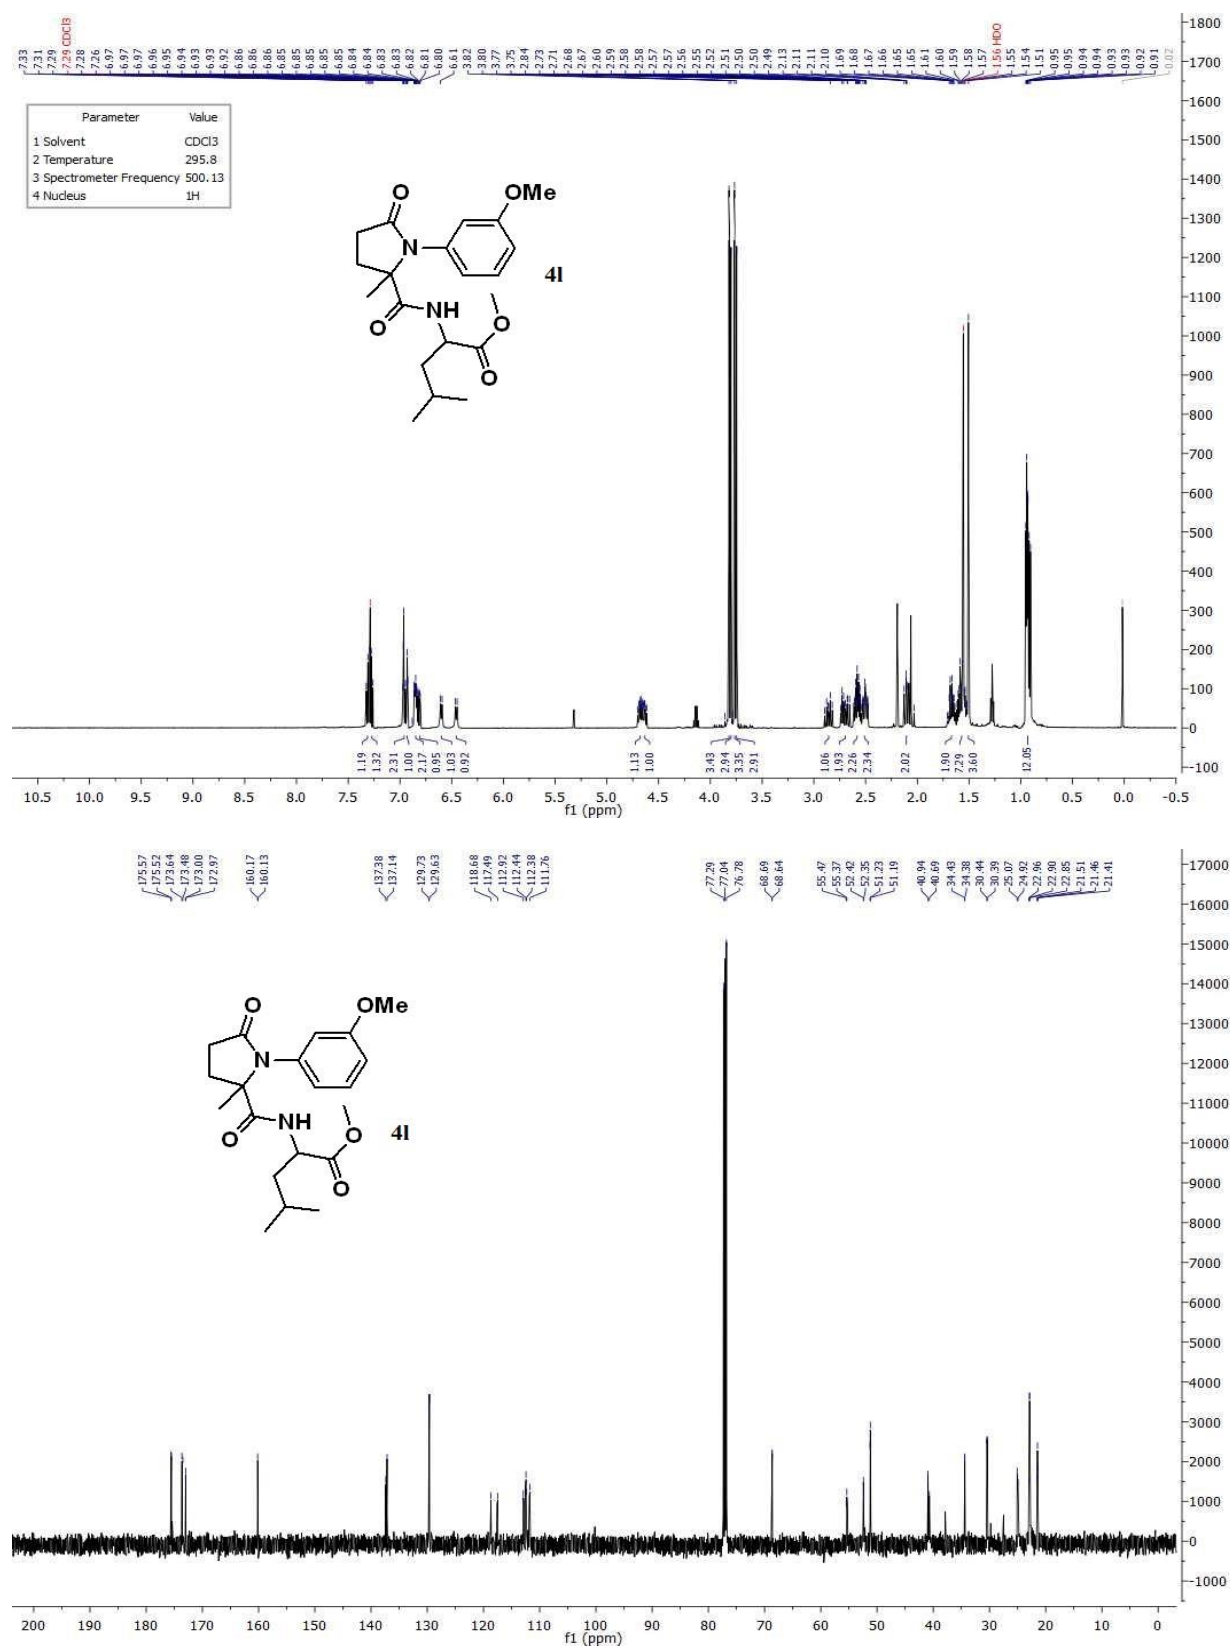

**4m:** Methyl (1-(4-hydroxyphenyl)-2-methyl-5-oxopyrrolidine-2-carbonyl)leucinate

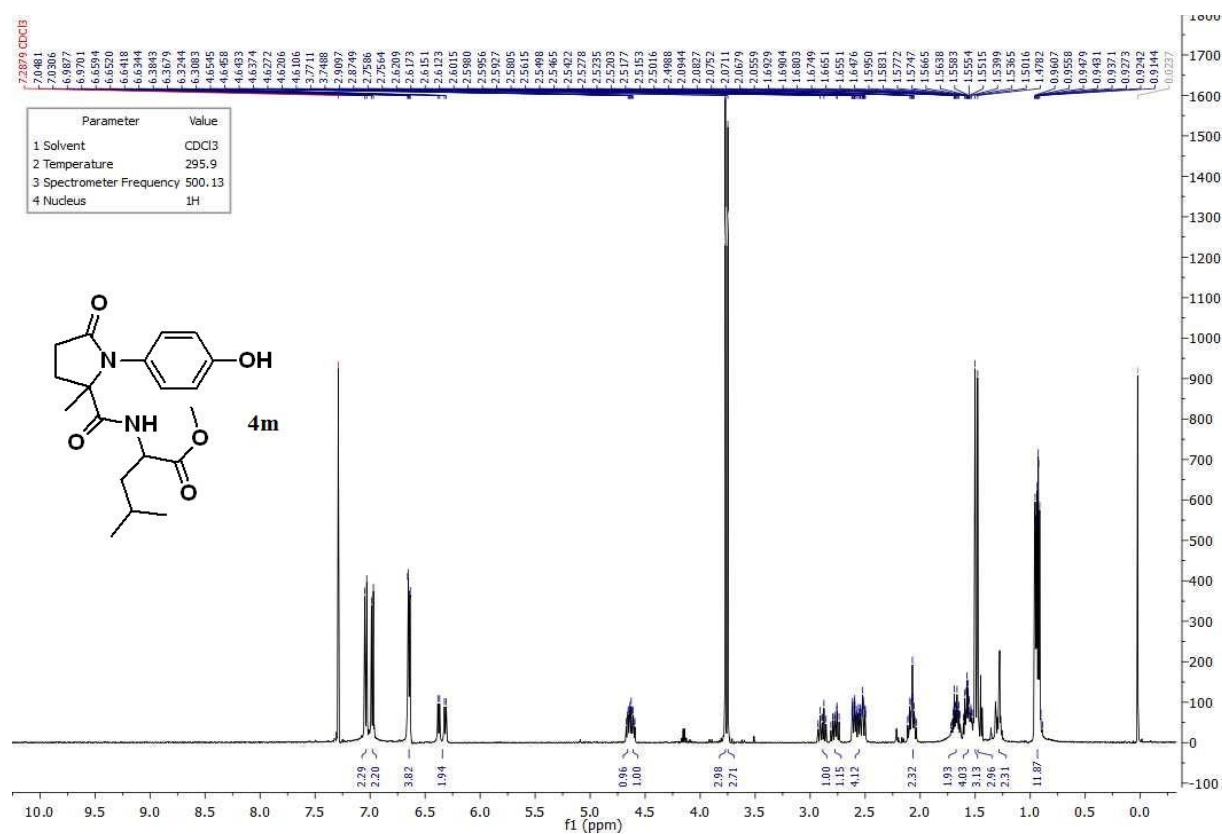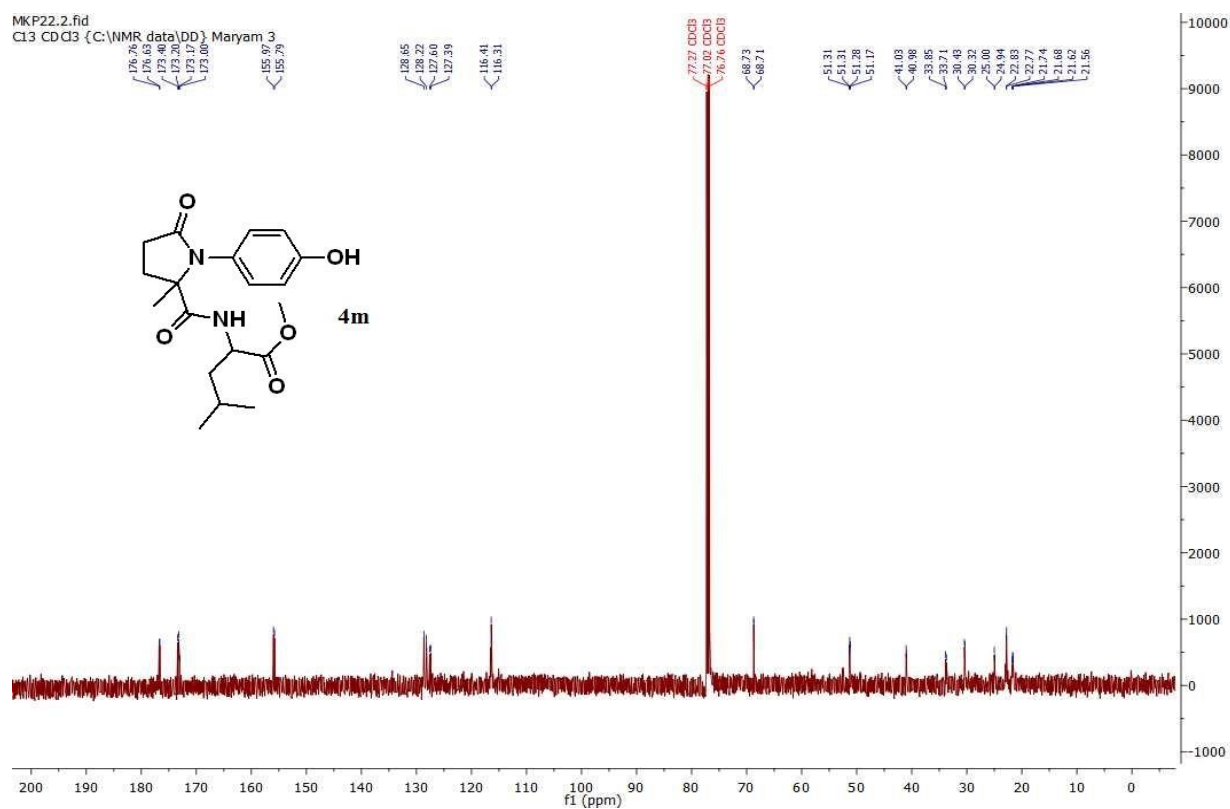

**4n:** Methyl (2-methyl-5-oxo-1-phenylpyrrolidine-2-carbonyl)phenylalaninate

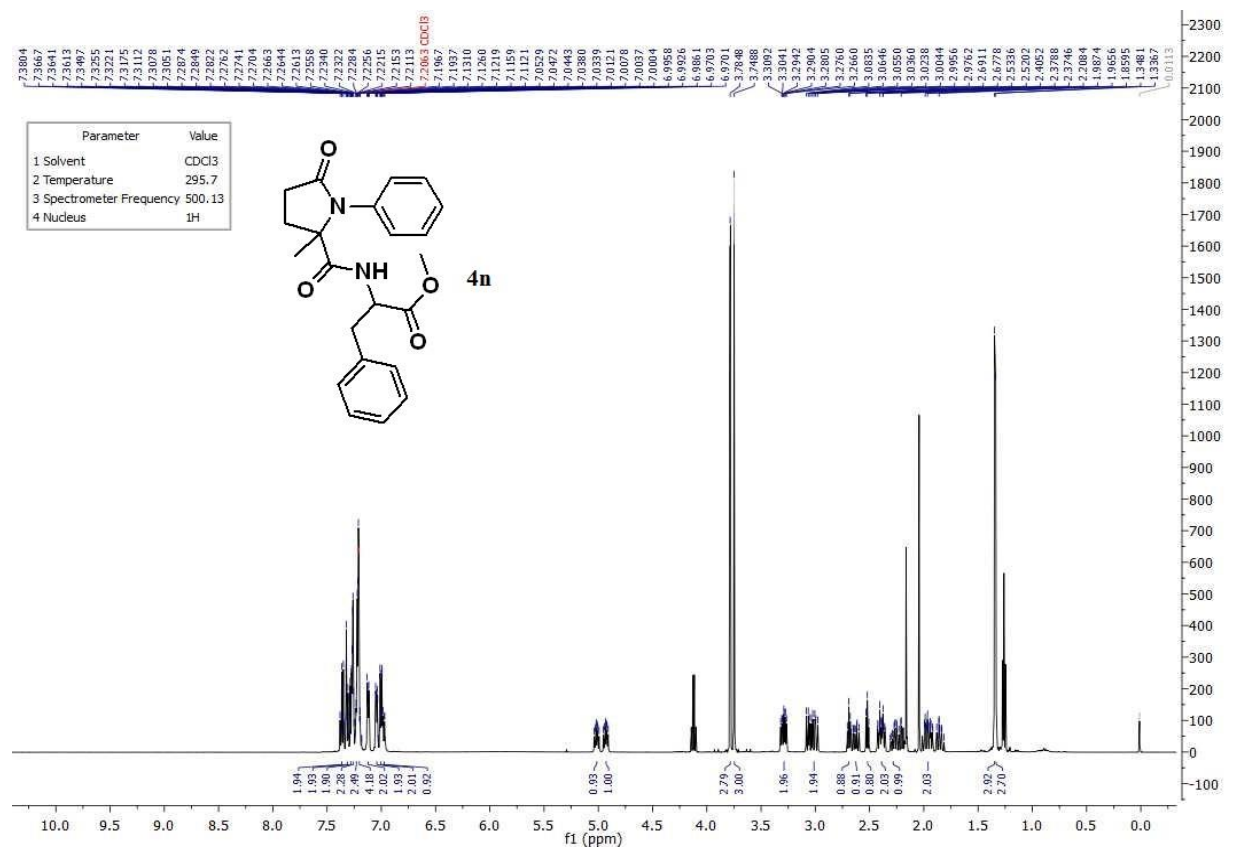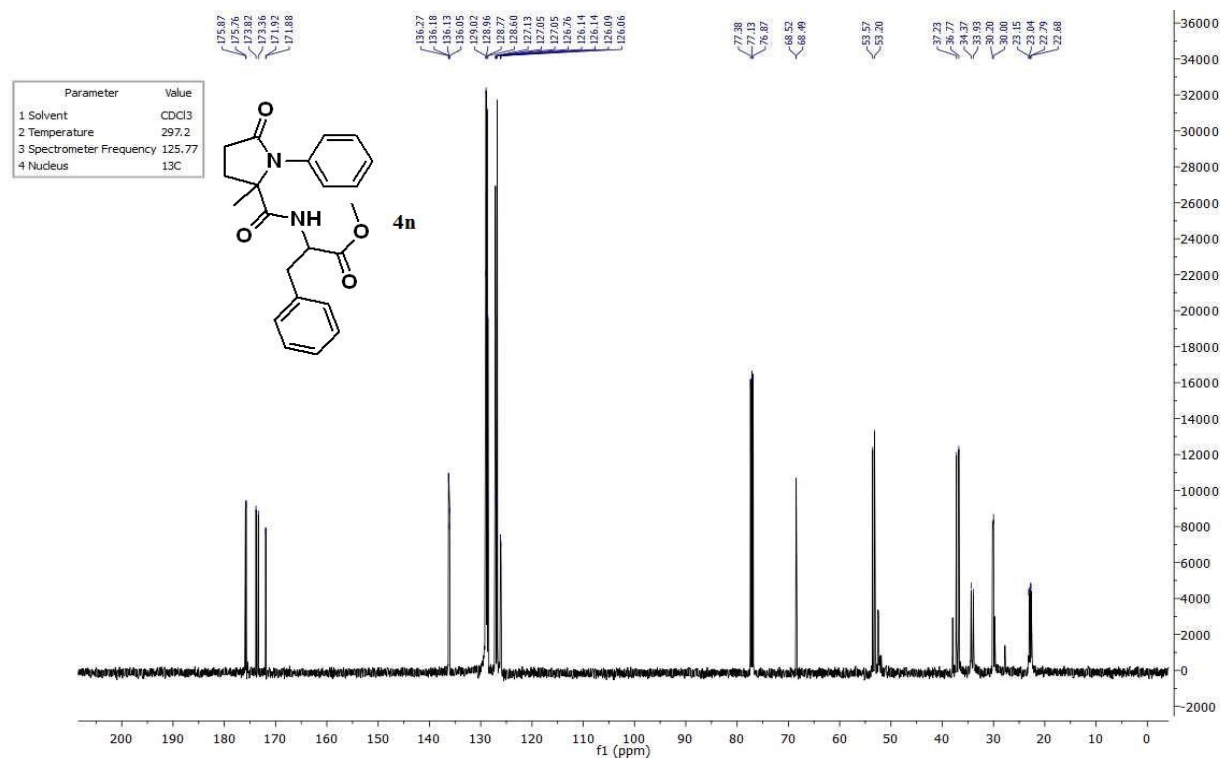

**4o:** Methyl (1-(4-chlorophenyl)-2-methyl-5-oxopyrrolidine-2-carbonyl)phenylalaninate

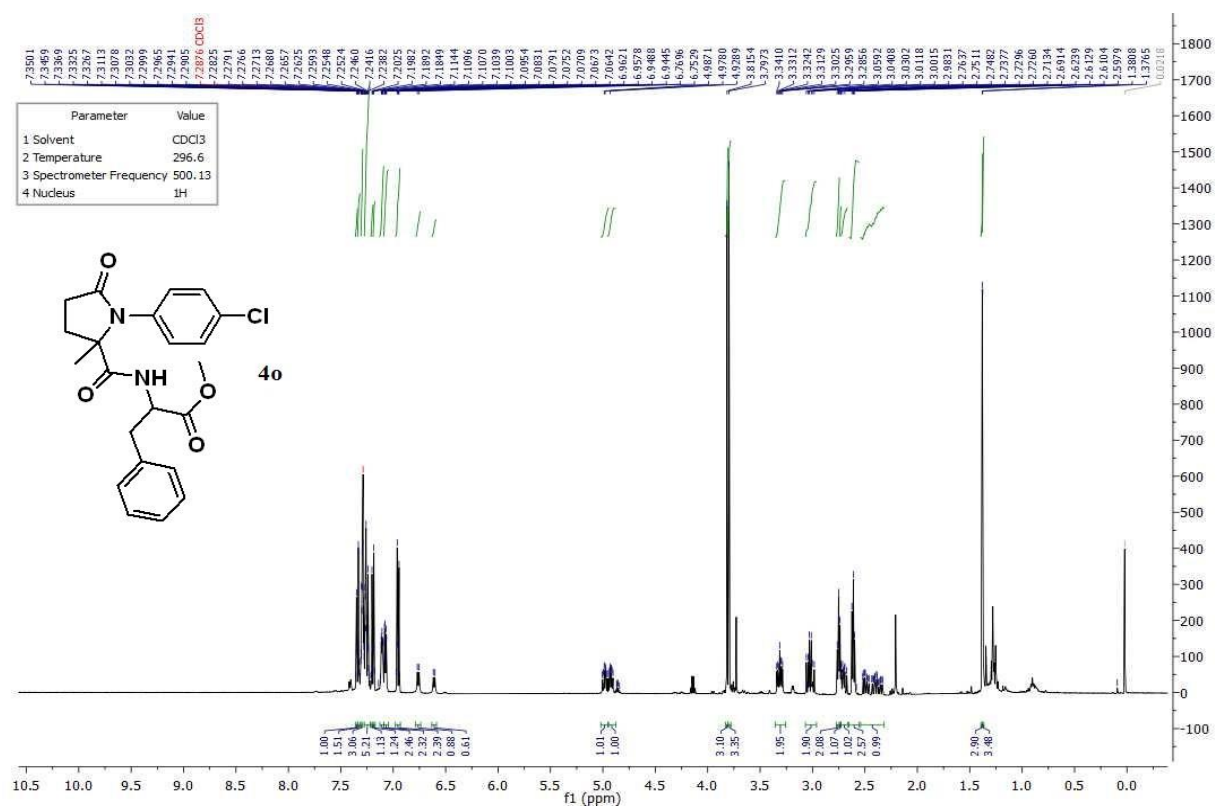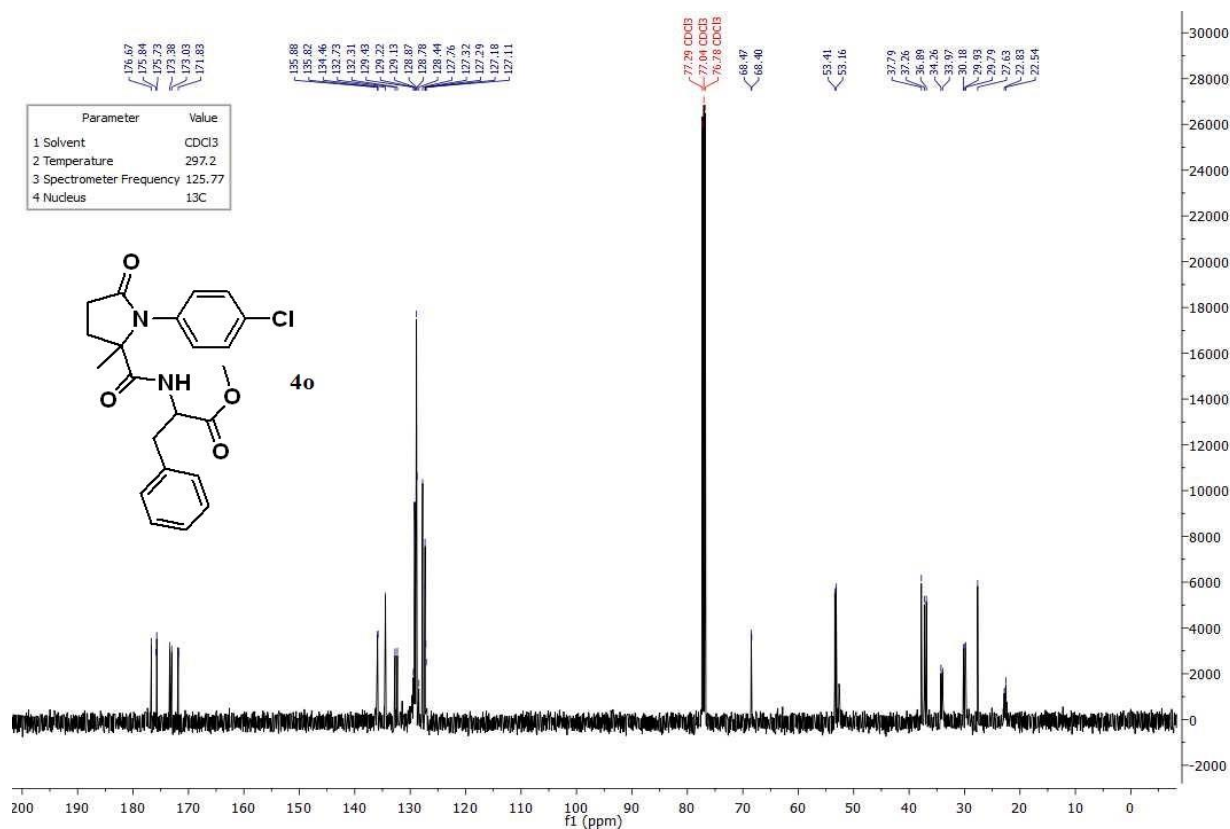



**4p:** Methyl (1-(4-hydroxyphenyl)-2-methyl-5-oxopyrrolidine-2-carbonyl)phenylalaninate

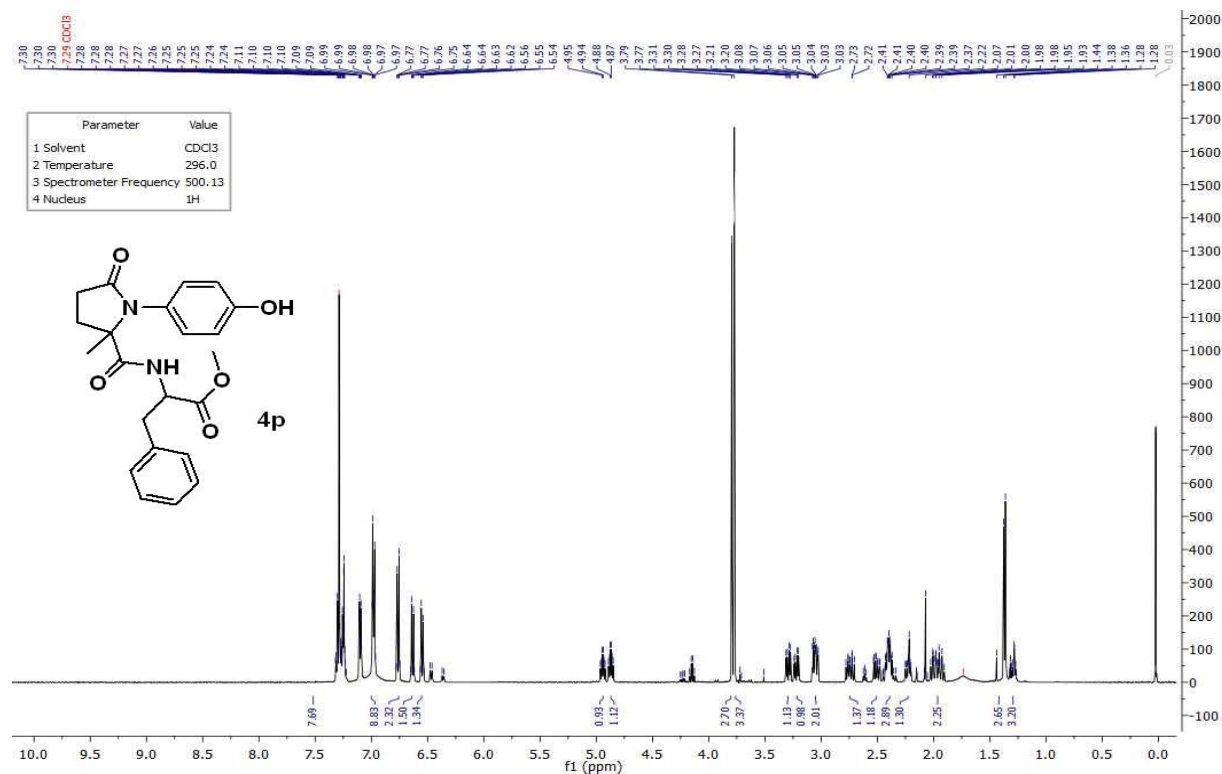

**X-ray crystallography**Crystal data of compound (*R*\*,*S*\*)-**4a** (CCDC- 1896942 )

|                                   |                                                               |                        |  |
|-----------------------------------|---------------------------------------------------------------|------------------------|--|
| Empirical formula                 | C <sub>24</sub> H <sub>25</sub> N <sub>3</sub> O <sub>4</sub> |                        |  |
| Formula weight                    | 419.47                                                        |                        |  |
| Temperature                       | 298 (2)                                                       |                        |  |
| Wavelength                        | 0.71073                                                       |                        |  |
| Crystal system                    | triclinic                                                     |                        |  |
| Space group                       | <i>P</i> -1                                                   |                        |  |
| Unit cell dimensions              | <i>a</i> = 9.6897(19) Å                                       | <i>α</i> = 117.44(3) ° |  |
|                                   | <i>b</i> = 12.831(3) Å                                        | <i>β</i> = 98.57(3) °  |  |
|                                   | <i>c</i> = 12.984(3) Å                                        | <i>γ</i> = 103.49(3)°  |  |
| Volume                            | 1330.2(8)                                                     |                        |  |
| Z                                 | 2                                                             |                        |  |
| Calculated density                | 1.047 Mg/m <sup>3</sup>                                       |                        |  |
| Absorption coefficient            | 0.072 mm <sup>-1</sup>                                        |                        |  |
| F(000)                            | 444                                                           |                        |  |
| Crystal size                      | 0.500 x 0.400 x 0.200 mm <sup>3</sup>                         |                        |  |
| Theta range for data collection   | 1.85 to 25.00 °                                               |                        |  |
| Index ranges                      | -11<= <i>h</i> <=11, -15<= <i>k</i> <=13, 0<= <i>l</i> <=15   |                        |  |
| Reflections collected             | 4648                                                          |                        |  |
| Independent reflections           | 4648 [R(int) = 0.0000]                                        |                        |  |
| Data / restraints / parameters    | 4648/2/288                                                    |                        |  |
| Goodness-of-fit on F <sup>2</sup> | 0.936                                                         |                        |  |
| Final R indices [I>2σ(I)]         | R1 = 0.1018, ωR2 = 0.2673                                     |                        |  |
| R indices (all data)              | R1 = 0.1717, ωR2 = 0.3041                                     |                        |  |
| Largest diff. peak and hole       | 0.433 and -0.282 e×Å <sup>3</sup>                             |                        |  |
